# Supplementary material
Source: PubMed Central journal article supplement (PMC4623439)
Supplement: kepi-09-11-983371-s001.pdf [file kepi-09-11-983371-s001.pdf]

## Supplementary Materials

### Experimental Procedures:

Animal Husbandry and Surgery: Wild type male 2-month old C57BL/6J mice (Jackson Laboratory, Bar Harbor, ME) were maintained on 12 h dark-light cycles with *ad libitum* access to standard rodent chow and water. Partial hepatectomy (PH) was performed using methodology described here and previously (1-4): Briefly, mice were sedated with inhaled isoflurane (VEDCO, Inc., St. Joseph, MO) via an anesthesia vaporizer, then subjected to mid-ventral laparotomy with exposure, ligation and resection of the left and median hepatic lobes, followed by closure of the peritoneal and skin wounds. At serial times after surgery, animals were sacrificed by exsanguination under anesthesia and serum and liver tissue were harvested. Some mice were treated with 25 mg/kg of the zinc-dependent HDAC inhibitor suberoylanilide hydroxyamic acid (SAHA, Cayman Chemical, Ann Arbor, MI; 2.5 mg/mL in 0.5% methylcellulose and 0.1% Tween 80) or with vehicle (as control) administered twice daily by gavage beginning 24 hours before surgery and continued until the time of sacrifice, as we have previously described (5). At least three animals were examined for each surgical and treatment group. Post-operative hepatic tissue necrosis was observed in ~20% of the operated mice, with no difference in frequency between SAHA- and vehicle-treated mice. Therefore, this finding, which is within the range we have generally observed with this model, was considered a technical complication of the model and such animals were excluded from further analyses. All experiments were approved by the Animal Studies Committee of Washington University and conducted in accordance with institutional guidelines and the criteria outlined in the "Guide for Care and Use of Laboratory Animals" (NIH publication 86-23).

Acetyl-Histone ChIP: Ac-H3K9 ChIP of liver was performed as previously described (5). Briefly, frozen liver was minced, cross-linked in 1% formaldehyde, homogenized, and suspended in nuclear lysis buffer in the presence of protease inhibitors, then centrifuged to recover chromatin, which was sheared in a Bioruptor Sonicator (Diagenode) to generate uniform 100-500 base pair (bp) fragments. Equal quantities of chromatin (based on protein content) were immunoprecipitated using a ChIP-grade antibody against Ac-H3K9 or rabbit IgG as non-specific control (Abcam). The anti-Ac-H3K9 antibody was validated for specificity by dot blot against a panel of unmodified, acetylated, and methylated peptides and by immunoblot against liver tissue (as recommended by Egelhofer *et al.* (6)).

Semiquantitative Real-Time Reverse-Transcription Polymerase-Chain-Reaction (qRT-PCR) Gene Expression Analysis: Hepatic expression of specific genes was characterized using qRT-PCR as described previously (2;7-10). Briefly, total liver RNA purified using the TRIZOL method (Invitrogen, Carlsbad, CA) was reverse-transcribed to cDNA, an aliquot of which was added to a reaction mixture containing gene-specific forward and reverse primers, deoxynucleotides, Taq DNA polymerase, and SYBR (Bio-Rad, Hercules, CA). Quantification of cDNA was conducted by monitoring increased SYBR fluorescence during exponential phase amplification in a real-time PCR MxPro3005 machine (Stratagene, La Jolla, CA), using the comparative threshold (Ct) method (11). Data were standardized to the expression of  $\beta$ 2-microglobulin (B2M), which has commonly been used as a reference gene in analyses of liver regeneration (12-14) and exhibits an expression pattern homologous to other genes used for this purpose (e.g.  $\beta$ -actin (15) and glyceraldehyde-3-phosphate dehydrogenase (16)), to calculate fold-differences in gene expression. Specificity was verified for each gene using melt-curves and by simultaneous analysis of a reaction mixture containing all components except reverse transcriptase. Gene-specific primers for these studies are listed below.

Statistical Analysis: ChIP-Seq data were analyzed as described in Experimental Procedures in the primary text. Data were analyzed using PASW Statistics version 18.0 (SPSS, Chicago, IL). Numerical data comparisons between groups were conducted using the unpaired Student's t-test for pair-wise comparisons and ANOVA for multiple groups with Tukey's test used for post-hoc comparisons. Rates and proportions were compared between groups using chi-square analysis. Significance (alpha) was set at 0.05. Data are reported as mean  $\pm$  standard error.

## Gene-Specific Oligonucleotide Primers for qRT-PCR Analyses of mRNA expression

| Gene    | Forward Primer          | Reverse Primer          |
|---------|-------------------------|-------------------------|
| B2M     | CCAGAAAACCCCTCAAATTCAAG | AGTTCAGTATGTTTCGGCTTCCC |
| Adipor2 | GGAGATTTGGAGCCCAGCTT    | CCATAGCATGATGGGCCTGT    |
| Bcar1   | GATGGGAGGGAACAAAGCCA    | CGTACTCATCCTGCTCCGTC    |
| Bik     | CCTCATGGAGTGCGTGGAAG    | CTGTAGGTGACAGCGAGTCT    |
| Bmf     | CAGACCAGTTCCATCGGCTT    | TGTTCAAGGCGAGGTTTTGA    |
| Csk     | AGAAGCGTGAGGGTGTGAAG    | TCTGGTGGGTAAAGAAGCCG    |
| Dap     | CCACATACCGGAGATGGGAAG   | GGGAAGTCTTTGTCACCCCG    |
| Ddah1   | CGTCGTGTGCGAGGAGAC      | GCTGAAGTTTTTCAAAGCCTCT  |
| Dpm1    | GATGATGGAAGCCCAGACGG    | ATGTAGGCAGTTCCGAGACC    |
| Egfr    | TCAGCAACAACCCCATCCTC    | GCTTGGATCACATTTGGGGC    |
| Ern1    | TGTCTCGACCCTGGATGGAA    | ACCTGCAGGACTGGATCTTC    |
| Foxo1   | AGAGCGTGCCCTACTTCAAG    | AGTCATCGTTGCTGTGGGAC    |
| Foxo3   | AAACGGCTCACTTTGTCCCA    | ATTCTGAACGCGCATGAAGC    |
| Gadd45g | CTCTGGAAGAAGTCCGTGGC    | TTCAGGACTTTGGCGGACTC    |
| Gclc    | GATGTGGACACCCGATGCAG    | CTCTCTCATCCACCTGGCAA    |
| Igf1    | TTTGCGGGGCTGAGCTGGTG    | GCCCTCCGAATGCTGGAGCC    |
| Jmy     | TTGCAGAGGCCACAAGTAA     | TCAATTCTTCGAGGGCCCAA    |
| Lcn2    | CAGAAGGCAGCTTTACGATGT   | GATCCAGTAGCGACAGCCC     |
| Myc     | AGTGCTGCATGAGGAGACAC    | CAGGGGTTTGCCTCTTCTCC    |
| Ndfip1  | ATGCTCCTCCACCATACAGC    | ACGATGGGGGCTTTGGAAAT    |
| Nlrp12  | AGGACAGGGAGAAGACCTGG    | GGGAGAGACATCCAAAGGGC    |
| Nr3c1   | TGGAATAGGTGCCAAGGGTC    | CTGGTCTCATTCCAGGGCTT    |
| Pik3r1  | TGTGGCACAGACTTGGTGTT    | TTCAGCATCCTGCAAGGACA    |
| Prox1   | CACCGCAGAAGGACTCTCTTT   | GGTGATAGCCCTTCCTGCAT    |
| Sesn2   | CGAGTGCCATTCCGAGATCA    | CACTGGAATGAAAGCGCTGG    |
| Sik1    | GGGAGGTCCAGCTCATGAAA    | GTGCCCCGTTGGAAGTCAGAT   |
| Tcf7l2  | AAACAGCTCCTCCGATTCCG    | AAAGAGCCCTCCATCTTGCC    |
| Tmbim6  | CAGGGGCCTATGTCCATGTG    | CCCAGTCTCTTTTGCTCGGT    |
| Traf4   | TGAGGACCAACTTCCTCTGGA   | TGTTCAAGTGCCCTGTAGAT    |

## Supplementary Figures:

### Supplementary Figure 1

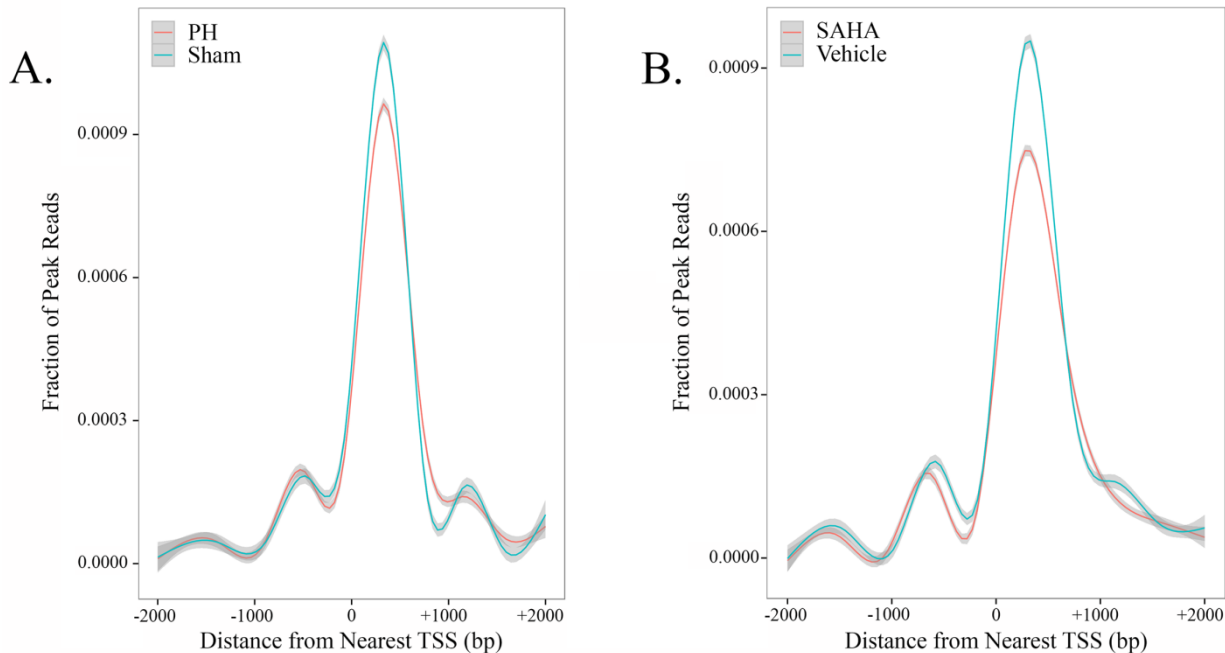

**Distribution of AcH3K9 ChIP-Seq Sequence Peaks versus Distance from Transcription Start Sites (TSS).** For sequence peaks identified by MACS (see Experimental Procedures in primary text and (17)), the software determines distance from the peak “summit” (i.e. the most abundantly represented nucleotide in sequences that make up the peak) to the nearest TSS. The graphs plot the fraction of sequences in peaks whose summits are the distance from a TSS specified along the x-axis in proportion to the total number of sequence reads assigned to peaks in the sample along the y-axis, for samples from regenerating (PH), sham-operated (Sham), and SAHA-treated- (SAHA) and vehicle-treated- (vehicle) regenerating livers.

### Supplementary Figure 2

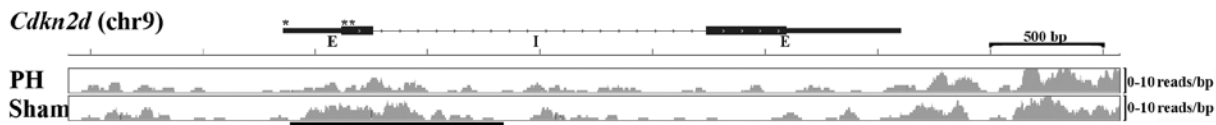

***Cdkn2d* Histone H3K9 Acetylation in Regenerating versus Sham-Operated Liver.** 12 hours after PH. UCSC gene maps (transcription (\*) and translation (\*\*) start sites, exons (E), and introns (I) as designated) are aligned with abundance of immunoprecipitated sequence (sequence reads per bp with scale indicated to the right) integrated from livers of 3 replicates each after PH or sham surgery. The sequence abundance images were generated using the Integrative Genomics Viewer (IGV) genome browser (18;19)). The bar below the sequence abundance data indicates the specific sequence identified as differentially acetylated.

## Supplementary Figure 3:

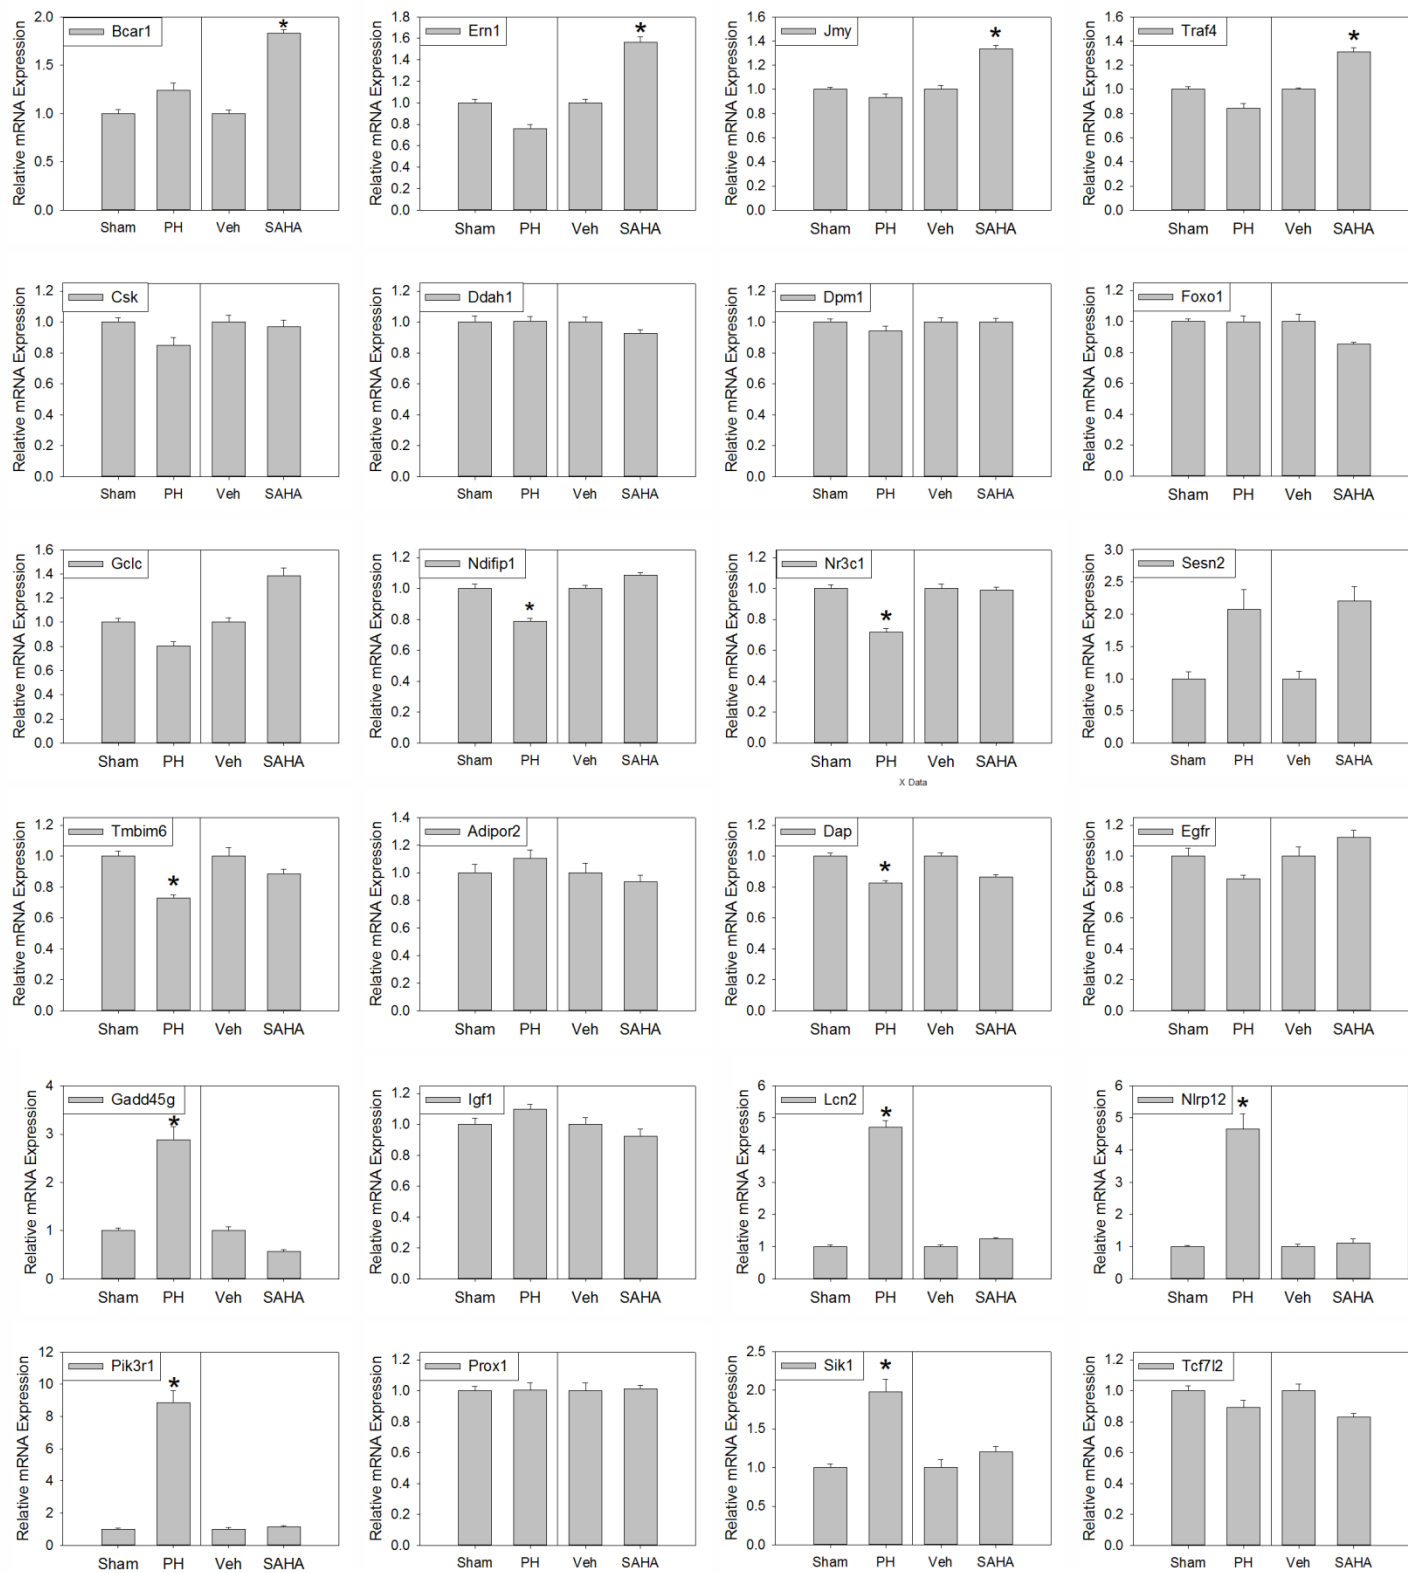

**Hepatic mRNA Expression of Differentially Acetylated Genes in Regenerating Liver.** Relative mRNA expression ( $\pm$  standard error) 12 hours after PH or sham surgery (indexed to sham; \* $p < 0.05$  for PH versus sham;  $n = 6$  replicates per experimental group) or 12 hours after PH in vehicle- (Veh) or SAHA-treated mice (indexed to Veh; \* $p < 0.05$  for SAHA versus vehicle;  $n = 6$  replicates per experimental group).

## Supplementary Table Legends:

**Supplementary Table 1:** Summary of DNA sequences (and corresponding genes) identified as differentially acetylated in replicates (n=3 each) of regenerating versus sham-operated liver, as described in experimental methods, sorted by false discovery rate (FDR), for genes that are de- (left, shaded) or hyper- (right, not shaded) acetylated by PH. The FDR threshold for inclusion on this table was set to  $q < 0.2$ , with  $q < 0.1$  used for all analyses except where otherwise noted. Column headings refer to individual sequences: Chr/Start/End – chromosomal location of gene using mouse reference genome mm9; Fold – log 2 fold difference in abundance of acetylated sequences in regenerating versus sham-operated liver (i.e. fold $<0$  for genes deacetylated by PH versus sham, fold $>0$  for genes hyper-acetylated by PH versus sham; FDR – determined using Benjamini-Hochberg method (20;21); TSS – MACS defined distance of sequence peak summit from nearest transcription start site; Gene - Official gene symbol of gene whose TSS is closest to the differentially acetylated sequence.

**Supplementary Table 2:** Summary of DNA sequences (and corresponding genes) identified as differentially acetylated in replicates (n=4 each) of regenerating vehicle versus SAHA-treated liver, as described in experimental methods, sorted by false discovery rate (FDR), for genes that are de- (left, shaded) or hyper- (right, not shaded) acetylated by SAHA. The FDR threshold for inclusion on this table was set to  $q < 0.2$ , with  $q < 0.1$  used for all analyses except where otherwise noted. Column headings refer to individual sequences: Chr/Start/End – chromosomal location of gene using mouse reference genome mm10; Fold – log 2 fold difference in abundance of acetylated sequences in vehicle- versus SAHA-treated regenerating liver (i.e. fold $<0$  for genes deacetylated by SAHA versus vehicle, fold $>0$  for genes hyper-acetylated by SAHA versus vehicle; FDR – determined using Benjamini-Hochberg method (20;21); TSS – MACS defined distance of sequence peak summit from nearest transcription start site; Gene - Official gene symbol of gene whose TSS is closest to the differentially acetylated sequence.

**Supplementary Table 3:** All cell proliferation- and cell death-associated genes differentially acetylated 12 hours after PH by SAHA versus vehicle, identified using DAVID bioinformatics database as described in text (see references 11-12), and listed by “Official gene symbol.”

**Supplementary Table 4:** All genes whose differential acetylation by PH versus sham 12 hours after surgery is reversed by SAHA versus vehicle using (A)  $q < 0.1$  or (B)  $q < 0.2$ , identified using DAVID bioinformatics database as described in text (see references 11-12), and listed by “Official gene symbol.”

## Reference List

1. Rudnick,D.A., Perlmutter,D.H. and Muglia,L.J. (2001) Prostaglandins are required for CREB activation and cellular proliferation during liver regeneration. *Proceedings of the National Academy of Sciences of the United States of America*, **98**, 8885-8890.
2. Shteyer,E., Liao,Y., Muglia,L.J., Hruz,P.W. and Rudnick,D.A. (2004) Disruption of hepatic adipogenesis is associated with impaired liver regeneration in mice. *Hepatology*, **40**, 1322-1332.
3. Liao,Y., Shikapwashya,O.N., Shteyer,E., Dieckgraefe,B.K., Hruz,P.W. and Rudnick,D.A. (2004) Delayed hepatocellular mitotic progression and impaired liver regeneration in early growth response-1-deficient mice. *J. Biol. Chem.*, **279**, 43107-43116.
4. Clark,A., Weymann,A., Hartman,E., Turmelle,Y., Carroll,M., Thurman,J.M., Holers,V.M., Hourcade,D.E. and Rudnick,D.A. (2008) Evidence for non-traditional activation of complement factor C3 during murine liver regeneration. *Mol. Immunol.*, **45**, 3125-3132.
5. Huang,J., Barr,E. and Rudnick,D.A. (2013) Characterization of the regulation and function of zinc-dependent histone deacetylases during rodent liver regeneration. *Hepatology*, **57**, 1742-1751.
6. Egelhofer,T.A., Minoda,A., Klugman,S., Lee,K., Kolasinska-Zwierz,P., Alekseyenko,A.A., Cheung,M.S., Day,D.S., Gadel,S., Gorchakov,A.A. *et al.* (2011) An assessment of histone-modification antibody quality. *Nat. Struct. Mol. Biol.*, **18**, 91-93.
7. Turmelle YP, Shikapwashya O, Tu S, Hruz PW, Yan Q and Rudnick DA (2006) Rosiglitazone Inhibits Mouse Liver Regeneration. *The FASEB Journal*, **20**, 2609-2611.
8. Clark,A., Weymann,A., Hartman,E., Turmelle,Y., Carroll,M., Thurman,J.M., Holers,V.M., Hourcade,D.E. and Rudnick,D.A. (2008) Evidence for non-traditional activation of complement factor C3 during murine liver regeneration. *Mol. Immunol.*, **45**, 3125-3132.
9. Weymann,A., Hartman,E., Gazit,V., Wang,C., Glauber,M., Turmelle,Y. and Rudnick,D.A. (2009) p21 is required for dextrose-mediated inhibition of mouse liver regeneration. *Hepatology*, **50**, 207-215.
10. Gazit,V., Weymann,A., Hartman,E., Finck,B.N., Hruz,P.W., Tzekov,A. and Rudnick,D.A. (2010) Liver regeneration is impaired in lipodystrophic fatty liver dystrophy mice. *Hepatology*, **52**, 2109-2117.
11. Schefe,J.H., Lehmann,K.E., Buschmann,I.R., Unger,T. and Funke-Kaiser,H. (2006) Quantitative real-time RT-PCR data analysis: current concepts and the novel "gene expression's CT difference" formula. *J. Mol. Med.*, **84**, 901-910.
12. Cressman,D.E., Greenbaum,L.E., DeAngelis,R.A., Ciliberto,G., Furth,E.E., Poli,V. and Taub,R. (1996) Liver failure and defective hepatocyte regeneration in interleukin-6- deficient mice. *Science*, **274**, 1379-1383.
13. Yamada,Y., Kirillova,I., Peschon,J.J. and Fausto,N. (1997) Initiation of liver growth by tumor necrosis factor: deficient liver regeneration in mice lacking type I tumor necrosis factor receptor. *Proceedings of the National Academy of Sciences of the United States of America*, **94**, 1441-1446.
14. Greenbaum,L.E., Li,W., Cressman,D.E., Peng,Y., Ciliberto,G., Poli,V. and Taub,R. (1998) CCAAT enhancer- binding protein beta is required for normal hepatocyte proliferation in mice after partial hepatectomy. *Journal of Clinical Investigation*, **102**, 996-1007.
15. Li,W., Liang,X., Kellendonk,C., Poli,V. and Taub,R. (2002) STAT3 contributes to the mitogenic response of hepatocytes during liver regeneration. *Journal of Biological Chemistry*, **277**, 28411-28417.
16. Sakamoto,T., Liu,Z., Murase,N., Ezure,T., Yokomuro,S., Poli,V. and Demetris,A.J. (1999) Mitosis and apoptosis in the liver of interleukin-6-deficient mice after partial hepatectomy. *Hepatology*, **29**, 403-411.
17. Zhang,Y., Liu,T., Meyer,C.A., Eeckhoute,J., Johnson,D.S., Bernstein,B.E., Nusbaum,C., Myers,R.M., Brown,M., Li,W. *et al.* (2008) Model-based analysis of ChIP-Seq (MACS). *Genome Biol.*, **9**, R137.
18. Robinson,J.T., Thorvaldsdottir,H., Winckler,W., Guttman,M., Lander,E.S., Getz,G. and Mesirov,J.P. (2011) Integrative genomics viewer. *Nat. Biotechnol.*, **29**, 24-26.
19. Thorvaldsdottir,H., Robinson,J.T. and Mesirov,J.P. (2013) Integrative Genomics Viewer (IGV): high-performance genomics data visualization and exploration. *Brief. Bioinform.*, **14**, 178-192.
20. Benjamini,Y. and Hochberg,Y. (1995) Controlling the false discovery rate: a practical and powerful approach to multiple testing. *J. Roy. Stat. Soc. B.*, **57**, 289-300.
21. Benjamini,Y., Drai,D., Elmer,G., Kafkafi,N. and Golani,I. (2001) Controlling the false discovery rate in behavior genetics research. *Behav. Brain Res.*, **125**, 279-284.

Supplementary Table 1

| Chr   | Start     | End       | Fold  | FDR       | TSS     | Gene          | Chr   | Start     | End       | Fold | FDR       | TSS     | Gene          |
|-------|-----------|-----------|-------|-----------|---------|---------------|-------|-----------|-----------|------|-----------|---------|---------------|
| chr2  | 58607366  | 58612416  | -1.96 | 1.34E-19  | 2296    | Upp2          | chr19 | 17385719  | 17387313  | 2.09 | 1.29E-12  | 27542   | Gcnt1         |
| chr6  | 55121342  | 55125924  | -1.47 | 6.95E-14  | 1351    | Inmt          | chr7  | 3247986   | 3249759   | 1.91 | 5.51E-12  | 869     | Nlrp12        |
| chr7  | 15028557  | 15030459  | -2.85 | 1.70E-12  | 2428    | 2810007J24Rik | chr1  | 91450734  | 91455431  | 1.31 | 2.55E-11  | 101697  | Agap1         |
| chr3  | 98563060  | 98567674  | -1.63 | 5.05E-11  | 966     | Hsd3b3        | chr9  | 74376672  | 74379484  | 1.71 | 1.59E-09  | -318165 | Gm16551       |
| chr4  | 60677477  | 60679050  | -2.33 | 5.07E-09  | -2996   | Mup11         | chr15 | 59379495  | 59381824  | 1.61 | 4.42E-09  | -99549  | Trib1         |
| chr7  | 15030513  | 15032037  | -1.99 | 1.70E-07  | 661     | 2810007J24Rik | chr7  | 31734931  | 31736287  | 1.67 | 5.07E-09  | 6213    | Usf2          |
| chr2  | 118379483 | 118381169 | -2.34 | 2.27E-07  | -4912   | Bmf           | chrX  | 7316751   | 7318066   | 2.55 | 5.53E-09  | 1042    | Ccdc120       |
| chr4  | 60887107  | 60889351  | -1.67 | 1.12E-06  | 1089    | Mup13         | chr9  | 74708833  | 74717047  | 1.02 | 2.23E-08  | 3213    | Onecut1       |
| chr11 | 117683034 | 117697683 | -0.90 | 1.12E-06  | -3030   | Tk1           | chr9  | 74374469  | 74376579  | 1.59 | 2.66E-08  | -320719 | Gm16551       |
| chr11 | 5810778   | 5817687   | -1.02 | 2.12E-06  | -15447  | Myl7          | chr1  | 123226365 | 123229914 | 0.98 | 2.77E-08  | 1027    | Insig2        |
| chr12 | 111257072 | 111262676 | -0.94 | 2.70E-06  | 136409  | 3110009F21Rik | chr5  | 91710806  | 91712402  | 1.60 | 3.72E-07  | 498     | Gm19619       |
| chr4  | 61336267  | 61339101  | -1.31 | 2.83E-06  | -2556   | LOC100048884  | chr15 | 74722767  | 74723619  | 2.32 | 2.83E-06  | -11059  | 2010109I03Rik |
| chr2  | 118369551 | 118376360 | -0.91 | 2.83E-06  | 2459    | Bmf           | chr2  | 172985585 | 172987922 | 1.19 | 5.47E-06  | 8180    | Pck1          |
| chr3  | 98447760  | 98450252  | -1.53 | 3.04E-06  | 451     | Hsd3b5        | chr2  | 129058256 | 129060399 | 1.09 | 5.60E-06  | 14623   | A730036I17Rik |
| chr5  | 151394456 | 151398527 | -0.83 | 5.32E-06  | 609     | N4bp2l1       | chr2  | 32240499  | 32245207  | 0.82 | 7.25E-06  | 406     | Lcn2          |
| chr15 | 77559385  | 77562751  | -1.25 | 7.22E-06  | 1518    | Apol9b        | chr9  | 31810637  | 31811892  | 1.87 | 8.63E-06  | -90394  | Barx2         |
| chr13 | 60276201  | 60280066  | -1.01 | 9.59E-06  | 763     | Gas1          | chr1  | 191872541 | 191873766 | 1.68 | 1.36E-05  | 121406  | Prox1         |
| chrX  | 147481465 | 147482864 | -1.82 | 1.08E-05  | 389     | Fgd1          | chr9  | 95475204  | 95477507  | 1.16 | 1.53E-05  | 16120   | Paqr9         |
| chr17 | 80772267  | 80773056  | -2.87 | 1.53E-05  | 221     | Gm10190       | chr13 | 52006659  | 52007986  | 1.57 | 1.53E-05  | 65279   | Gadd45g       |
| chr10 | 75356162  | 75357553  | -1.56 | 1.60E-05  | 715     | Derl3         | chr19 | 4496435   | 4500292   | 0.79 | 2.33E-05  | 220     | 2010003K11Rik |
| chr10 | 70800150  | 70808833  | -0.81 | 1.61E-05  | 3106    | Cisd1         | chr5  | 125556566 | 125557831 | 2.40 | 2.33E-05  | 73354   | Fam101a       |
| chr4  | 61103140  | 61104162  | -2.17 | 3.99E-05  | -2915   | Mup15         | chr7  | 31724563  | 31725397  | 2.18 | 3.89E-05  | 4056    | Hamp          |
| chr9  | 103011063 | 103011863 | -1.66 | 4.08E-05  | -2940   | Rab6b         | chr6  | 121286650 | 121287675 | 1.82 | 4.08E-05  | -9552   | Slc6a12       |
| chr15 | 102013875 | 102020632 | -0.88 | 4.08E-05  | 2221    | Csad          | chr2  | 152560914 | 152565887 | 0.71 | 4.08E-05  | 1391    | Id1           |
| chr4  | 60432587  | 60435011  | -1.43 | 4.31E-05  | 1025    | Mup9          | chr4  | 46883416  | 46884736  | 1.40 | 4.08E-05  | 120510  | Gabbr2        |
| chr16 | 23608868  | 23612566  | -0.92 | 5.11E-05  | 713     | Rtp4          | chr17 | 32007451  | 32010787  | 0.98 | 5.06E-05  | -16382  | Sik1          |
| chr19 | 8477489   | 8479673   | -1.26 | 5.69E-05  | 1014    | Slc22a30      | chr13 | 51967346  | 51968740  | 1.39 | 5.95E-05  | 26000   | Gadd45g       |
| chr15 | 100133604 | 100139517 | -0.74 | 5.69E-05  | 1313    | Mettl7a1      | chr9  | 64949393  | 64950765  | 1.68 | 6.79E-05  | 778     | Ilgdcc4       |
| chr4  | 61179312  | 61184236  | -0.96 | 5.99E-05  | -1256   | Mup16         | chr8  | 108273176 | 108274709 | 1.36 | 7.01E-05  | 8565    | Gfod2         |
| chr4  | 60512684  | 60515003  | -1.42 | 6.40E-05  | 989     | Mup1          | chr15 | 77159975  | 77162233  | 1.09 | 9.51E-05  | -23621  | Rbfox2        |
| chr15 | 81633007  | 81636665  | -0.93 | 7.12E-05  | 1734    | Tef           | chr9  | 108176516 | 108178103 | 1.38 | 0.0001192 | -11020  | Dag1          |
| chr18 | 38577760  | 38580514  | -0.90 | 8.84E-05  | 509     | Ndfip1        | chr14 | 55191216  | 55192678  | 1.52 | 0.0001192 | 4551    | Ajuba         |
| chr10 | 116847466 | 116852072 | -0.83 | 9.40E-05  | -35740  | Cpsf6         | chr17 | 29230374  | 29233269  | 0.83 | 0.0001411 | 1105    | Cdkn1a        |
| chr4  | 61258968  | 61260524  | -1.94 | 9.51E-05  | -2882   | Mup17         | chr7  | 87799999  | 87803063  | 0.92 | 0.000203  | 20629   | Gm15880       |
| chr12 | 104893260 | 104895434 | -1.27 | 0.0001182 | 934     | Serpina6      | chr4  | 122630825 | 122639844 | 0.58 | 0.0002338 | 3097    | Mfsd2a        |
| chr1  | 93308135  | 93311722  | -0.87 | 0.0001563 | -129    | Hes6          | chr13 | 52116113  | 52117388  | 1.27 | 0.0002411 | -75359  | 4921525O09Rik |
| chr8  | 96885841  | 96889850  | -1.12 | 0.0001564 | -22554  | Herpud1       | chr7  | 31731611  | 31733438  | 1.19 | 0.0002881 | -3488   | Hamp          |
| chr13 | 9010820   | 9011425   | -1.36 | 0.0001671 | -15864  | Gtpbp4        | chr1  | 157652470 | 157661328 | 0.51 | 0.0003396 | 3130    | Qsox1         |
| chr11 | 60018729  | 60025031  | -0.78 | 0.000203  | 12226   | Srebf1        | chr7  | 31726464  | 31730663  | 0.73 | 0.0003458 | 473     | Hamp          |
| chr4  | 61099503  | 61100958  | -1.50 | 0.000274  | 505     | Mup2          | chr4  | 150114250 | 150115659 | 1.43 | 0.0003458 | -88671  | Slc45a1       |
| chr12 | 111516454 | 111517209 | -2.62 | 0.0002856 | -492    | Mir1247       | chr6  | 31058811  | 31060478  | 1.38 | 0.0003604 | -46551  | Mir29b-1      |
| chr8  | 95801085  | 95803917  | -0.88 | 0.0003164 | 1134    | Ces1f         | chr13 | 51960756  | 51961647  | 1.65 | 0.0004715 | 19158   | Gadd45g       |
| chr4  | 60517236  | 60518793  | -1.56 | 0.0003777 | -3182   | Mup1          | chr9  | 74370407  | 74371476  | 2.49 | 0.0005343 | -325302 | Gm16551       |
| chr6  | 129482806 | 129487347 | -0.69 | 0.0003927 | -1774   | 1700101I11Rik | chr1  | 158586655 | 158588944 | 1.25 | 0.000538  | 16671   | Tor3a         |
| chr19 | 41903709  | 41906494  | -0.87 | 0.0005121 | 642     | Frat1         | chr6  | 51631257  | 51633150  | 1.45 | 0.0005993 | 137682  | Snx10         |
| chr15 | 77239273  | 77241644  | -1.21 | 0.0005208 | 1006    | Apol9a        | chr8  | 108532119 | 108536396 | 0.65 | 0.0006274 | 1129    | Ddx28         |
| chr17 | 35561016  | 35563961  | -0.91 | 0.0005433 | 667     | H2-Q6         | chr15 | 6822490   | 6824967   | 0.87 | 0.0006645 | 585     | Osmr          |
| chr12 | 92933143  | 92934892  | -1.19 | 0.0005629 | 90859   | Ston2         | chr8  | 10939104  | 10940061  | 1.85 | 0.0006645 | -11125  | 3930402G23Rik |
| chr7  | 87600315  | 87603851  | -0.86 | 0.000589  | -51766  | Furin         | chr11 | 86681509  | 86685603  | 0.77 | 0.0007456 | -62394  | Dhx40         |
| chrX  | 8469371   | 8470852   | -1.49 | 0.0006391 | 633     | B630019K06Rik | chr8  | 11220699  | 11221553  | 1.45 | 0.0007545 | 91700   | Col4a1        |
| chr1  | 152975715 | 152981346 | -0.59 | 0.0006645 | -6633   | C730036E19Rik | chr13 | 52119388  | 52121138  | 1.06 | 0.0007584 | -71846  | 4921525O09Rik |
| chr18 | 21101080  | 21105110  | -0.84 | 0.0007948 | -30     | Rnf125        | chr9  | 107197476 | 107203136 | 0.73 | 0.0007643 | 1287    | Cish          |
| chr4  | 60081052  | 60084013  | -1.03 | 0.0009511 | 815     | Mup7          | chr3  | 21861529  | 21863301  | 1.00 | 0.0010967 | -113158 | Tbl1xr1       |
| chr12 | 105190073 | 105196624 | -0.61 | 0.0010134 | 1759    | Serpina1e     | chr16 | 43247332  | 43248571  | 1.34 | 0.0010967 | 555     | Zbtb20        |
| chr7  | 52958511  | 52966142  | -0.64 | 0.0010404 | 1710    | Dbp           | chr1  | 157641041 | 157642190 | 1.19 | 0.0011202 | 18414   | Qsox1         |
| chr1  | 21230537  | 21236863  | -0.61 | 0.001093  | 3031    | Gsta3         | chr16 | 11008362  | 11010292  | 1.08 | 0.0011997 | 337     | Gm4262        |
| chr14 | 58363260  | 58365822  | -0.85 | 0.0012122 | 419     | Lats2         | chr7  | 112748912 | 112750449 | 1.16 | 0.0011997 | -1050   | Hpx           |
| chr4  | 61441333  | 61443372  | -1.16 | 0.0013269 | 906     | Mup19         | chr2  | 24907021  | 24909483  | 0.90 | 0.0014629 | -1646   | Nsmf          |
| chr6  | 30249470  | 30250158  | -2.26 | 0.0015984 | 4725    | Ube2h         | chr8  | 108530163 | 108531100 | 1.78 | 0.0016141 | 4755    | Ddx28         |
| chr12 | 109511276 | 109513676 | -0.94 | 0.0016141 | 1151    | Ccdc85c       | chr4  | 14949635  | 14950478  | 1.94 | 0.0016432 | 92269   | Gm11837       |
| chr4  | 129190730 | 129192041 | -1.33 | 0.0019541 | 561     | Marcks1       | chr14 | 66493274  | 66494188  | 1.45 | 0.0018627 | 37593   | Ccdc25        |
| chr8  | 122752481 | 122754244 | -1.52 | 0.0021146 | -51993  | Fam92b        | chr7  | 56711837  | 56714024  | 0.89 | 0.0019541 | 179275  | Dbx1          |
| chr1  | 21294801  | 21295789  | -1.84 | 0.0024513 | -6902   | Gm4956        | chr11 | 87030634  | 87031495  | 2.06 | 0.0023958 | 90488   | Trim37        |
| chr2  | 154916453 | 154918098 | -1.40 | 0.0025827 | 8540    | 2310005A03Rik | chr2  | 11401032  | 11402170  | 1.43 | 0.0024513 | 22116   | Pfkfb3        |
| chr5  | 53132631  | 53134176  | -0.95 | 0.0026952 | 591     | Pi4k2b        | chr8  | 35095870  | 35099188  | 0.64 | 0.0026952 | -57216  | Rbpms         |
| chr4  | 61190239  | 61192167  | -1.12 | 0.0027729 | -10685  | Mup16         | chr9  | 103142740 | 103146259 | 0.85 | 0.0026952 | -11883  | Trf           |
| chr4  | 61443566  | 61445339  | -1.25 | 0.0027787 | -1194   | Mup19         | chr9  | 23027876  | 23028638  | 1.43 | 0.0029645 | 738     | Bmper         |
| chr6  | 141892041 | 141896244 | -0.86 | 0.0030977 | 1341    | Slco1a1       | chr3  | 82803120  | 82807107  | 0.76 | 0.0030569 | -6704   | Fgg           |
| chr18 | 21118760  | 21121809  | -0.76 | 0.0030977 | 17159   | Rnf125        | chr13 | 52275445  | 52278434  | 0.82 | 0.0030569 | 84830   | 4921525O09Rik |
| chr5  | 43623119  | 43627777  | -0.70 | 0.0030987 | 747     | Cpeb2         | chrX  | 136343002 | 136345690 | 0.75 | 0.0031164 | 9000    | Cldn2         |
| chr7  | 82599856  | 82602746  | -0.90 | 0.0032799 | 882     | Akap13        | chr14 | 76172381  | 76173482  | 1.41 | 0.0032432 | 13913   | Slc25a30      |
| chr10 | 84038350  | 84041253  | -0.72 | 0.0032799 | 110     | Tcp1112       | chr2  | 10053243  | 10053945  | 1.81 | 0.0034744 | -1284   | Itih2         |
| chr4  | 60684834  | 60686768  | -1.05 | 0.0039856 | -10534  | Mup11         | chr7  | 152114082 | 152115485 | 1.23 | 0.0035216 | 11047   | Ccnd1         |
| chr16 | 90830211  | 90832408  | -0.88 | 0.0041567 | 206     | Eva1c         | chr7  | 56777736  | 56782488  | 0.60 | 0.0037549 | 112093  | Dbx1          |
| chr5  | 118426306 | 118430336 | -0.75 | 0.0042117 | 1543    | Fbxo21        | chr6  | 85806315  | 85807508  | 0.99 | 0.0039856 | 12220   | Cml2          |
| chr19 | 41920443  | 41923335  | -0.78 | 0.0043562 | 733     | Frat2         | chr9  | 74172410  | 74174140  | 1.15 | 0.0040709 | 215135  | Wdr72         |
| chr17 | 34117538  | 34118965  | -1.35 | 0.0044251 | -185    | AA388235      | chr4  | 137323939 | 137326614 | 0.73 | 0.0042998 | 27016   | Alpl          |
| chr4  | 60737334  | 60740035  | -1.03 | 0.0045844 | -2531   | Mup12         | chr18 | 65209756  | 65211105  | 1.18 | 0.0044251 | 27250   | Nedd4l        |
| chr4  | 60962889  | 60965847  | -0.99 | 0.0051682 | 662     | Mup14         | chr17 | 31460449  | 31462276  | 0.90 | 0.0049746 | 28194   | Slc37a1       |
| chr4  | 32324831  | 32327510  | -0.83 | 0.0052137 | -178239 | Bach2         | chr4  | 122647637 | 122650014 | 0.86 | 0.0051313 | -10     |               |

Supplementary Table 1

|       |           |           |       |           |         |               |       |           |           |      |           |         |               |
|-------|-----------|-----------|-------|-----------|---------|---------------|-------|-----------|-----------|------|-----------|---------|---------------|
| chr5  | 135581507 | 135589547 | -0.64 | 0.0065146 | 2767    | Mlxipl        | chr9  | 48407452  | 48410484  | 0.79 | 0.0080787 | 4214    | Nnmt          |
| chr4  | 61333090  | 61335289  | -1.10 | 0.006579  | 939     | LOC100048884  | chr18 | 65211581  | 65212679  | 0.97 | 0.0080787 | 28950   | Nedd4l        |
| chr11 | 86804823  | 86808724  | -0.60 | 0.0068208 | 491     | Ypel2         | chr13 | 98623447  | 98624093  | 1.62 | 0.0081358 | 293816  | Gm5086        |
| chr5  | 136362976 | 136365241 | -0.83 | 0.0069623 | 320     | Hspb1         | chr9  | 60880965  | 60881640  | 1.58 | 0.0084781 | 16427   | Gm5122        |
| chr8  | 95718226  | 95721783  | -0.62 | 0.0071534 | 1699    | Ces1d         | chr10 | 127006602 | 127009154 | 0.79 | 0.008562  | -36263  | Nxph4         |
| chr4  | 60151696  | 60152982  | -1.34 | 0.0079741 | 390     | Mup2          | chr5  | 125027984 | 125030456 | 0.59 | 0.0087019 | 64      | Gtf2h3        |
| chr8  | 114260653 | 114261346 | -1.93 | 0.0084079 | -4963   | Bcar1         | chr17 | 57370436  | 57376380  | 0.46 | 0.0092171 | -5849   | C3            |
| chr3  | 14861558  | 14865341  | -0.72 | 0.0084744 | -88     | Car3          | chr18 | 65376515  | 65385950  | 0.58 | 0.0092171 | -27282  | Mir122a       |
| chr5  | 125805703 | 125807604 | -0.95 | 0.0102596 | 14811   | Scarb1        | chr3  | 94587416  | 94589130  | 0.90 | 0.0092973 | 2164    | Cgn           |
| chr2  | 32836276  | 32838476  | -0.81 | 0.0102596 | 200     | Slc2a8        | chr11 | 89862201  | 89864635  | 0.63 | 0.0096218 | 790     | Pctp          |
| chr4  | 61255568  | 61257100  | -1.20 | 0.0103296 | 530     | Mup17         | chr10 | 82784232  | 82785782  | 0.79 | 0.0096218 | 15555   | Slc41a2       |
| chr3  | 121909817 | 121911016 | -1.51 | 0.0103829 | -38058  | Gclm          | chr9  | 74643506  | 74645069  | 1.25 | 0.0096218 | -51956  | Gm16551       |
| chr7  | 104562071 | 104572399 | -0.55 | 0.0103829 | -1215   | Thrsp         | chr9  | 74176297  | 74177342  | 1.97 | 0.00967   | 218679  | Wdr72         |
| chr11 | 98697796  | 98699152  | -1.20 | 0.0107291 | 376     | Rapgef1l      | chr3  | 116669192 | 116672614 | 0.52 | 0.0097837 | -281    | 4930455H04Rik |
| chr10 | 129849209 | 129849824 | -1.70 | 0.0113953 | 17152   | Vmn2r85       | chr17 | 24664936  | 24667274  | 0.55 | 0.0103829 | 910     | 2610019E17Rik |
| chr3  | 89711086  | 89718121  | -0.50 | 0.0116162 | 2481    | Il6ra         | chr14 | 121651992 | 121653857 | 0.85 | 0.0103829 | 125528  | Stk24         |
| chr7  | 74903782  | 74904675  | -2.04 | 0.0117627 | 400     | Symn          | chr1  | 195136444 | 195138037 | 1.01 | 0.0107338 | 9053    | Lamb3         |
| chrX  | 30545260  | 30546573  | -1.01 | 0.0121004 | -52394  | Gm2799        | chr17 | 32637521  | 32639209  | 0.97 | 0.01109   | -5041   | Cyp4f17       |
| chr11 | 57905672  | 57909162  | -0.78 | 0.0128411 | -10237  | Cnot8         | chr5  | 145983199 | 145984747 | 0.94 | 0.0113989 | -8610   | Zfp655        |
| chr14 | 8868870   | 8870223   | -1.18 | 0.0131501 | 34131   | Abhd6         | chr8  | 36753107  | 36753705  | 1.42 | 0.0117627 | -101332 | Gm16793       |
| chr7  | 88356448  | 88360114  | -0.66 | 0.0134033 | -408    | Pde8a         | chr4  | 141497375 | 141499164 | 0.79 | 0.0117949 | -40637  | Gm13037       |
| chr2  | 58612904  | 58615292  | -1.07 | 0.0139533 | 6503    | Upp2          | chr14 | 8671218   | 8674633   | 0.72 | 0.0121004 | 22455   | Flnb          |
| chr4  | 132038855 | 132039945 | -1.27 | 0.0140833 | -19564  | Med18         | chr9  | 62008832  | 62009647  | 1.27 | 0.0122815 | -38838  | Mir5133       |
| chr2  | 118686794 | 118688772 | -0.77 | 0.0140896 | 48      | Ivd           | chr6  | 70796794  | 70797521  | 1.38 | 0.0127062 | 2637    | Eif2ak3       |
| chr9  | 42077823  | 42083119  | -0.69 | 0.0140896 | -8088   | Sc5d          | chr16 | 92397478  | 92401662  | 0.46 | 0.0128411 | 752     | Rcan1         |
| chr4  | 123088072 | 123090150 | -0.85 | 0.0144294 | 43      | D830031N03Rik | chr1  | 40230676  | 40231978  | 1.03 | 0.013304  | -50597  | Il1r1         |
| chr13 | 63373179  | 63376806  | -0.71 | 0.0144911 | 23463   | Gm16907       | chr14 | 70727603  | 70732447  | 0.57 | 0.0135165 | 18215   | Slc39a14      |
| chr11 | 102089308 | 102092159 | -0.64 | 0.0145236 | 753     | Hdac5         | chr13 | 8883934   | 8886927   | 0.56 | 0.0135846 | 579     | Idi1          |
| chr2  | 152222033 | 152224764 | -0.96 | 0.0149051 | 384     | Sox12         | chr1  | 174919298 | 174921034 | 0.84 | 0.0139735 | 33268   | Olfrr16       |
| chr11 | 72223865  | 72225224  | -1.16 | 0.0153864 | 671     | Smtnl2        | chr16 | 20728774  | 20731014  | 0.56 | 0.0140911 | 777     | Thpo          |
| chr7  | 15024010  | 15025250  | -0.99 | 0.015427  | -730    | 2810007J24Rik | chr1  | 168183839 | 168185880 | 0.67 | 0.0142106 | 590     | Illdr2        |
| chr4  | 60735057  | 60736350  | -1.31 | 0.0156224 | 450     | Mup12         | chr10 | 74513591  | 74515973  | 0.69 | 0.0142106 | -8858   | Bcr           |
| chr12 | 45322495  | 45323487  | -1.15 | 0.0157628 | 649     | Gm2027        | chr11 | 96637614  | 96639151  | 0.72 | 0.0144616 | 487     | Snx11         |
| chr4  | 60733931  | 60734956  | -1.51 | 0.0157782 | 1710    | Mup12         | chr17 | 57359462  | 57367727  | 0.48 | 0.0144911 | 3965    | C3            |
| chr2  | 152897168 | 152898205 | -1.96 | 0.0158449 | 5996    | Ccm2l         | chr11 | 120946860 | 120947870 | 1.20 | 0.0153864 | -4912   | Sectm1a       |
| chrX  | 68617300  | 68618997  | -0.87 | 0.0158449 | 214     | Mtmr1         | chr6  | 94113141  | 94113633  | 1.79 | 0.0157628 | 120511  | Magi1         |
| chr1  | 36424146  | 36426576  | -0.75 | 0.0158449 | 665     | Kansl3        | chr4  | 140879054 | 140882456 | 0.73 | 0.0157808 | 23620   | Epha2         |
| chr7  | 71078366  | 71085295  | -0.59 | 0.0158449 | 1971    | Klf13         | chr7  | 28473228  | 28475402  | 0.70 | 0.0158449 | -43     | C030039L03Rik |
| chr5  | 151385857 | 151387883 | -0.99 | 0.0159082 | 10230   | N4bp2l1       | chr4  | 107895352 | 107896206 | 1.21 | 0.0158449 | -5252   | Zyg11a        |
| chr7  | 19601935  | 19603348  | -0.97 | 0.0159082 | 6247    | Foxa3         | chr4  | 46877082  | 46877559  | 1.71 | 0.0158449 | 127266  | Gabbr2        |
| chr4  | 60746028  | 60748028  | -0.96 | 0.0159082 | -10875  | Mup12         | chr14 | 41983274  | 41983942  | 2.04 | 0.0158449 | 14879   | Sftpd         |
| chr4  | 144480813 | 144488274 | -0.47 | 0.0159082 | 1504    | Dhrs3         | chr10 | 59246633  | 59248202  | 1.03 | 0.0159082 | 82035   | Micu1         |
| chr4  | 115329402 | 115330580 | -1.03 | 0.0160592 | -9681   | Cyp4b1        | chr11 | 120691150 | 120695334 | 0.57 | 0.0163101 | -7381   | Fasn          |
| chr9  | 61237201  | 61238033  | -1.53 | 0.0165544 | 17445   | Tle3          | chr18 | 75603473  | 75608408  | 0.58 | 0.0163442 | -68358  | Gm10532       |
| chr5  | 8622123   | 8623045   | -1.38 | 0.0165544 | 368     | Rundc3b       | chr6  | 144658357 | 144660084 | 0.97 | 0.0163442 | 37833   | 4933425H06Rik |
| chr14 | 70603158  | 70612427  | -0.49 | 0.0165544 | -314    | Sorbs3        | chr15 | 81189094  | 81191896  | 0.53 | 0.0165544 | 700     | Slc25a17      |
| chr4  | 60524631  | 60526523  | -1.01 | 0.0171708 | -10745  | Mup1          | chr5  | 116895725 | 116897629 | 0.58 | 0.0165544 | 7947    | 2410137F16Rik |
| chr4  | 60675499  | 60677256  | -0.98 | 0.0171708 | -1110   | Mup11         | chr7  | 152123471 | 152128845 | 0.57 | 0.0174181 | -328    | Ccnd1         |
| chr2  | 30327707  | 30329699  | -0.93 | 0.0171708 | 1016    | Ier5l         | chr11 | 116531972 | 116534831 | 0.50 | 0.017465  | -417    | Snord1c       |
| chr17 | 86921645  | 86922885  | -1.09 | 0.0171837 | -230938 | Epas1         | chr15 | 59145802  | 59148784  | 0.65 | 0.0178093 | 647     | Sqle          |
| chr6  | 51367681  | 51368714  | -1.58 | 0.017465  | -14471  | Nfe2l3        | chr6  | 138096661 | 138097526 | 1.28 | 0.0179088 | 8036    | Mgst1         |
| chr4  | 131603745 | 131605088 | -0.97 | 0.0179088 | 577     | Epb4.1        | chr3  | 145238919 | 145240263 | 0.58 | 0.018086  | 420     | Znhit6        |
| chr7  | 29940246  | 29941544  | -0.86 | 0.0179652 | 334     | Fam98c        | chr7  | 129275759 | 129277784 | 0.58 | 0.0186573 | 217     | Dctn5         |
| chr4  | 60162941  | 60164477  | -1.18 | 0.018086  | -10979  | Mup15         | chr15 | 74592961  | 74593769  | 1.24 | 0.0187287 | 632     | Ly6d          |
| chr2  | 122059238 | 122066042 | -0.46 | 0.018086  | 2066    | Sord          | chr4  | 150128729 | 150129565 | 1.52 | 0.0191581 | 99911   | 1700045H11Rik |
| chr10 | 86982263  | 86988944  | -0.55 | 0.0181045 | 1064    | Pah           | chr12 | 81180338  | 81181149  | 1.07 | 0.0191945 | 33257   | Zfp36l1       |
| chr15 | 82037343  | 82038332  | -1.67 | 0.0182127 | 5408    | Al848285      | chr13 | 63394783  | 63396785  | 0.84 | 0.01982   | 2671    | Gm16907       |
| chr4  | 131474943 | 131479247 | -0.74 | 0.0187287 | -590    | Tmem200b      | chr13 | 23960852  | 23962045  | 0.91 | 0.0200661 | -693    | Slc17a1       |
| chr5  | 87461379  | 87461862  | -2.64 | 0.0190075 | 31736   | Ugt2b35       | chr12 | 60140801  | 60141596  | 0.93 | 0.0200661 | 21250   | Trappc6b      |
| chr14 | 37780729  | 37784467  | -0.62 | 0.0194812 | -648    | Ccser2        | chr18 | 35888952  | 35890843  | 0.74 | 0.0205489 | 3255    | 1700066B19Rik |
| chr1  | 23389011  | 23390184  | -1.01 | 0.0198147 | 417     | Ogfrl1        | chr16 | 78305171  | 78306713  | 0.89 | 0.0212001 | 4027    | Cxadr         |
| chr11 | 61391379  | 61393450  | -0.74 | 0.01982   | 775     | Epn2          | chr18 | 3278469   | 3279984   | 0.99 | 0.0212001 | 2519    | Crem          |
| chr1  | 182126291 | 182127389 | -1.13 | 0.0202567 | -689    | Adck3         | chr9  | 74719284  | 74720195  | 1.55 | 0.0212001 | 10012   | Onecut1       |
| chr9  | 119310090 | 119313220 | -0.67 | 0.0203208 | 37      | Acvr2b        | chr19 | 47376224  | 47376886  | 2.04 | 0.0212001 | 73223   | Neurl1a       |
| chr6  | 31163915  | 31172913  | -0.53 | 0.0210153 | -1936   | 2210408F21Rik | chr8  | 120324435 | 120326954 | 0.58 | 0.0214681 | 135     | Mphosph6      |
| chr1  | 173340960 | 173343946 | -0.64 | 0.0212001 | 642     | Usf1          | chr2  | 157967452 | 157972853 | 0.44 | 0.0215414 | 1976    | Tgm2          |
| chr16 | 30253672  | 30262746  | -0.58 | 0.0212001 | 9409    | Cpn2          | chr9  | 95481846  | 95483484  | 0.76 | 0.0218075 | 22430   | Paqr9         |
| chr19 | 26677886  | 26683442  | -0.51 | 0.0212001 | 1015    | Smarca2       | chr15 | 75947564  | 75949922  | 0.59 | 0.0218094 | 1882    | Eppk1         |
| chr15 | 99221709  | 99231633  | -0.46 | 0.0212001 | 3022    | Tmbim6        | chr16 | 93928081  | 93930195  | 0.52 | 0.0218263 | 674     | Cldn14        |
| chr4  | 137263133 | 137264221 | -1.43 | 0.0212965 | 26096   | Rap1gap       | chr13 | 51961770  | 51962554  | 1.06 | 0.0218263 | 20119   | Gadd45g       |
| chr4  | 62875185  | 62879013  | -0.60 | 0.0214857 | 654     | Col27a1       | chr14 | 26357080  | 26358058  | 1.26 | 0.0218292 | 3645    | Mir3075       |
| chr16 | 13312393  | 13313356  | -1.32 | 0.0218075 | -45639  | Mkl2          | chr8  | 119517762 | 119518409 | 1.42 | 0.0218292 | -736    | Gcsh          |
| chr5  | 115021736 | 115022961 | -1.23 | 0.0222993 | 4089    | Fam222a       | chr16 | 43296820  | 43298560  | 0.97 | 0.0222031 | 50294   | Zbtb20        |
| chr19 | 44461926  | 44465183  | -0.69 | 0.0225924 | 18645   | Scd1          | chr4  | 135694698 | 135705081 | 0.40 | 0.0222188 | 153     | Id3           |
| chr9  | 43887193  | 43888323  | -1.19 | 0.0229586 | -5244   | Usp2          | chr15 | 77645184  | 77655210  | 0.48 | 0.0223203 | 22348   | Myh9          |
| chr1  | 57434137  | 57435636  | -0.76 | 0.0229586 | 423     | 1700066M21Rik | chr4  | 120839866 | 120841116 | 1.06 | 0.0227223 | 20648   | Rlf           |
| chr9  | 111341072 | 111344506 | -0.72 | 0.0230281 | 1205    | Dclk3         | chr13 | 114858038 | 114860083 | 0.79 | 0.022836  | 82740   | A430090L17Rik |
| chr1  | 182120264 | 182126255 | -0.55 | 0.024089  | 357     | Adck3         | chr4  | 135071264 | 135072392 | 1.20 | 0.0230782 | 19927   | Stpg1         |
| chr7  | 52745831  | 52747414  | -0.95 | 0.024775  | -2456   | Dhdh          | chr2  | 29947816  | 29951377  | 0.47 | 0.0232655 | -441    | Zdhhc12       |
| chr9  | 47129446  | 47130210  | -1.49 | 0.0251363 | -208606 | Cadm1         | chr18 | 67921822  | 67922767  | 1.22 | 0.0232655 | -12235  | Sehl1         |
| chr9  | 108697839 |           |       |           |         |               |       |           |           |      |           |         |               |

Supplementary Table 1

|       |           |           |       |           |        |               |       |           |            |      |           |         |               |
|-------|-----------|-----------|-------|-----------|--------|---------------|-------|-----------|------------|------|-----------|---------|---------------|
| chr6  | 29456771  | 29458291  | -1.00 | 0.0284859 | 421    | Kcp           | chr8  | 88011039  | 88012359   | 0.81 | 0.025469  | -4816   | Gpt2          |
| chr6  | 90455511  | 90460451  | -0.67 | 0.0285455 | -42860 | Aldh1l1       | chr19 | 4475839   | 4477828    | 0.58 | 0.0260919 | 310     | Syt12         |
| chr4  | 101091355 | 101094360 | -0.72 | 0.0286154 | 550    | Ak4           | chr13 | 98010264  | 98013442   | 0.49 | 0.0261289 | 794     | Enc1          |
| chr4  | 61177966  | 61179283  | -1.22 | 0.02877   | 1894   | Mup16         | chr11 | 93827929  | 93831199   | 0.49 | 0.0261289 | 271     | Nme1          |
| chr5  | 28362740  | 28365511  | -0.80 | 0.0295735 | -33826 | Insig1        | chr17 | 57348699  | 57352573   | 0.66 | 0.0261289 | 16923   | C3            |
| chr12 | 105005548 | 105012907 | -0.45 | 0.0295735 | 2616   | Serpina1d     | chr13 | 74637332  | 74639165   | 0.58 | 0.0261338 | -6850   | Zfp825        |
| chr9  | 43890631  | 43897629  | -0.52 | 0.0296458 | 1128   | Usp2          | chr11 | 78661445  | 78663486   | 0.65 | 0.026256  | 22369   | Lyrm9         |
| chr8  | 122972503 | 122973901 | -1.33 | 0.0296744 | -39563 | Gse1          | chr13 | 102460483 | 102465919  | 0.44 | 0.0266556 | -599    | Pik3r1        |
| chr10 | 127499269 | 127500413 | -1.32 | 0.0296744 | 3804   | Ptges3        | chr13 | 52121152  | 52121617   | 1.72 | 0.0267161 | -70725  | 4921525O09Rik |
| chr7  | 128849835 | 128851507 | -1.06 | 0.0296744 | 96     | Usp31         | chr15 | 61815236  | 61820266   | 0.43 | 0.0272125 | 856     | Myc           |
| chr11 | 86626113  | 86629481  | -0.70 | 0.0296744 | -6635  | Dhx40         | chr12 | 83578011  | 83578695   | 1.58 | 0.0272125 | -139671 | Rgs6          |
| chr4  | 61257762  | 61258850  | -1.33 | 0.0301735 | -1442  | Mup17         | chr2  | 130492797 | 130495039  | 0.55 | 0.0278462 | 342     | Itpa          |
| chr1  | 72257035  | 72259287  | -0.77 | 0.0303863 | 720    | Mreg          | chr3  | 148750086 | 148751361  | 1.17 | 0.0281931 | -133124 | Lphn2         |
| chr17 | 15159538  | 15162458  | -0.58 | 0.0303863 | -13850 | Gm3417        | chr19 | 47242632  | 47243793   | 1.08 | 0.0283467 | -10097  | Neurl1a       |
| chr3  | 52070621  | 52075722  | -0.50 | 0.0303863 | 913    | Foxo1         | chr4  | 57794888  | 57796834   | 0.64 | 0.0283917 | -62258  | Akap2         |
| chr2  | 103809476 | 103811846 | -0.70 | 0.03096   | 218    | Lmo2          | chr2  | 35902133  | 35905154   | 0.48 | 0.0284859 | 1169    | Ndufa8        |
| chr8  | 74152627  | 74153339  | -1.55 | 0.0312434 | 18061  | GlT25d1       | chr9  | 77799823  | 77801536   | 0.81 | 0.0284859 | 35508   | Elovl5        |
| chr17 | 34134638  | 34138308  | -0.64 | 0.031455  | 805    | H2-K1         | chr3  | 58176041  | 58177662   | 0.82 | 0.0284859 | -42759  | Tsc22d2       |
| chr2  | 154905181 | 154910350 | -0.58 | 0.0321393 | -7532  | Ahcy          | chr5  | 53380429  | 53385144   | 0.48 | 0.0287533 | 745     | 5033403H07Rik |
| chr14 | 62298784  | 62303502  | -0.51 | 0.0329846 | 67     | Dleu2         | chr7  | 19716864  | 19718049   | 0.82 | 0.0287533 | 12249   | Fbxo46        |
| chr12 | 85350018  | 85351519  | -0.92 | 0.0329943 | 317    | Acot1         | chr15 | 66985396  | 66987499   | 0.75 | 0.0288024 | 21997   | St3gal1       |
| chr17 | 85295028  | 85297031  | -0.82 | 0.0331049 | -60051 | Ppm1b         | chr4  | 137349568 | 137352450  | 0.60 | 0.0290324 | 1283    | Alpl          |
| chr4  | 151381603 | 151388210 | -0.53 | 0.0331101 | 1907   | Klhl21        | chr7  | 4080575   | 4081603    | 1.22 | 0.0294518 | 7439    | D030047H15Rik |
| chr2  | 160189630 | 160194223 | -0.48 | 0.0331101 | 875    | Mafb          | chr5  | 114595299 | 114598182  | 0.56 | 0.0296458 | 15576   | Ung           |
| chr16 | 33933976  | 33935782  | -1.00 | 0.034205  | 32210  | Umps          | chr12 | 118826691 | 118827800  | 1.25 | 0.0296744 | 72294   | Rapgef5       |
| chr9  | 66454199  | 66455251  | -1.09 | 0.0343498 | -13938 | Usp3          | chr12 | 81955337  | 81955819   | 1.51 | 0.030263  | 64060   | 4933426M11Rik |
| chr9  | 122026155 | 122033591 | -0.49 | 0.0350351 | 3490   | Snrk          | chr10 | 87378749  | 87379838   | 1.08 | 0.0303841 | -50122  | Tyms-ps       |
| chr8  | 96877491  | 96880827  | -0.68 | 0.0350776 | 26052  | Slc12a3       | chr1  | 75164384  | 75167388   | 0.51 | 0.0303863 | 578     | Zfand2b       |
| chr6  | 57482618  | 57485621  | -0.55 | 0.0353957 | 1301   | Ppm1k         | chr15 | 10153574  | 10154785   | 1.03 | 0.0303863 | 519     | Prlr          |
| chr4  | 61098518  | 61099321  | -1.62 | 0.0356672 | 1816   | Mup2          | chr9  | 77788847  | 77791381   | 0.65 | 0.0304499 | 24943   | Elovl5        |
| chr1  | 43502049  | 43503892  | -0.88 | 0.0356672 | 375    | Nck2          | chr5  | 44625365  | 44626193   | 1.43 | 0.0309225 | -7934   | Tapt1         |
| chr7  | 148236213 | 148239271 | -0.70 | 0.0356672 | -9430  | B4galnt4      | chr16 | 58677520  | 58678110   | 1.46 | 0.0312197 | 7495    | Cpox          |
| chr10 | 67592274  | 67600628  | -0.48 | 0.0356672 | 145023 | Arid5b        | chr18 | 67923989  | 67925310   | 0.89 | 0.0312434 | -9880   | Sehl1         |
| chr19 | 12771485  | 12772484  | -1.38 | 0.0357995 | 1705   | Keg1          | chr11 | 97546068  | 97549083   | 0.55 | 0.0321197 | 310     | Cisd3         |
| chr8  | 124466602 | 124470257 | -0.64 | 0.0359275 | 383    | Car5a         | chr8  | 126795743 | 126799747  | 0.54 | 0.0321393 | 42452   | Galnt2        |
| chr10 | 70809010  | 70813508  | -0.51 | 0.0362041 | 719    | lpmk          | chr7  | 25331160  | 25333324   | 0.59 | 0.0321393 | 74      | Xrcc1         |
| chr4  | 60974144  | 60975926  | -0.86 | 0.0372065 | -10005 | Mup14         | chr8  | 124851851 | 124855654  | 0.60 | 0.0329522 | 30894   | Trhr2         |
| chr18 | 21122034  | 21122503  | -1.66 | 0.0373549 | 19143  | Rnf125        | chr10 | 53117072  | 53118818   | 0.65 | 0.0331101 | -18288  | Cep85l        |
| chr15 | 79151147  | 79152207  | -1.25 | 0.0379877 | 7124   | Pla2g6        | chr4  | 55543475  | 55544226   | 1.49 | 0.0331101 | 1497    | Klf4          |
| chr14 | 56109282  | 56111041  | -1.07 | 0.0379877 | 232    | Lrrc16b       | chr9  | 20675138  | 20677366   | 0.76 | 0.0339518 | 3167    | A230050P20Rik |
| chr11 | 57909200  | 57912436  | -0.67 | 0.0380319 | -6836  | Cnot8         | chr11 | 7050265   | 7052435    | 0.66 | 0.0347388 | 37222   | Gm11985       |
| chr6  | 116599623 | 116603647 | -0.51 | 0.0381539 | 934    | 8430408G22Rik | chr11 | 75473973  | 75475719   | 0.96 | 0.0354372 | 5330    | Myo1c         |
| chr8  | 119779926 | 119786250 | -0.46 | 0.0381539 | 2170   | Cmip          | chr11 | 30096972  | 30099113   | 0.54 | 0.0354907 | 215     | Sptbn1        |
| chr2  | 103307692 | 103308238 | -1.50 | 0.0385742 | 17345  | Cat           | chr15 | 31182288  | 31190820   | 0.43 | 0.0356672 | 32415   | Dap           |
| chr6  | 37479964  | 37481881  | -0.70 | 0.0394315 | 750    | Akr1d1        | chr11 | 20369280  | 20370741   | 0.67 | 0.0356672 | -73245  | Sertad2       |
| chr19 | 36421782  | 36424556  | -0.64 | 0.0394728 | -30387 | Pcgf5         | chr7  | 51802840  | 51804358   | 0.72 | 0.0356672 | 586     | Pold1         |
| chr10 | 60600526  | 60601922  | -1.13 | 0.0395214 | 9189   | Sgpl1         | chr17 | 47012882  | 47014386   | 0.95 | 0.0356672 | -13935  | Tbcc          |
| chr15 | 83356385  | 83362608  | -0.53 | 0.0399368 | 2205   | Bik           | chr2  | 91082955  | 91083656   | 1.25 | 0.0357995 | 6003    | A330069E16Rik |
| chr14 | 66711302  | 66712442  | -1.24 | 0.0405601 | -15302 | Adam2         | chr1  | 174823641 | 174825209  | 0.79 | 0.0358732 | 760     | Apcs          |
| chr5  | 140580984 | 140582613 | -0.94 | 0.0410718 | 197902 | Elfn1         | chr9  | 36562926  | 36564814   | 0.76 | 0.0362874 | 11293   | Stt3a         |
| chr9  | 78202665  | 78203701  | -1.00 | 0.0414217 | -8231  | Gsta2         | chr6  | 119357789 | 119359966  | 0.60 | 0.036709  | 8624    | Adipor2       |
| chr11 | 53840927  | 53843136  | -0.73 | 0.0414217 | -439   | Slc22a4       | chr8  | 129037518 | 129039740  | 0.69 | 0.036764  | -39664  | Gm17296       |
| chr6  | 124806949 | 124808006 | -1.14 | 0.0416238 | 228    | Leprel2       | chr19 | 46130060  | 46132780   | 0.43 | 0.0370545 | 392     | Pprc1         |
| chr9  | 56007798  | 56009041  | -0.99 | 0.0416238 | 458    | Tspan3        | chr14 | 35160146  | 35165735   | 0.47 | 0.0370545 | 4700    | Gm3219        |
| chr7  | 104229421 | 104231646 | -0.67 | 0.0417711 | 273    | Gab2          | chr4  | 41070061  | 41072210   | 0.58 | 0.0370545 | 237     | Nol6          |
| chr9  | 45075190  | 45075946  | -1.35 | 0.0420318 | 1661   | Il10ra        | chr15 | 76411702  | 76415515   | 0.60 | 0.0370545 | 6820    | Adck5         |
| chr15 | 63890600  | 63892648  | -0.78 | 0.0420809 | 386    | Fam49b        | chr9  | 64020245  | 64023294   | 0.43 | 0.0373549 | 576     | Rpl4          |
| chr4  | 60533639  | 60534519  | -1.58 | 0.042302  | -19247 | Mup1          | chr2  | 158000695 | 158002635  | 0.73 | 0.0373549 | -16078  | 1700060C20Rik |
| chr4  | 154948923 | 154954063 | -0.57 | 0.0427029 | 13570  | Nadk          | chr12 | 29318429  | 29322035   | 0.45 | 0.0375093 | 586     | Rps7          |
| chr2  | 58604888  | 58605696  | -1.37 | 0.0436561 | -2303  | Upp2          | chr17 | 57341664  | 57344905   | 0.76 | 0.0375093 | -9675   | Tnfsf14       |
| chr3  | 40753565  | 40757005  | -0.54 | 0.043662  | 733    | Larp1b        | chr15 | 81757601  | 81759270   | 0.91 | 0.0375405 | -1792   | Polr3h        |
| chr18 | 12798812  | 12816538  | -0.45 | 0.043662  | 5634   | Ttc39c        | chr4  | 118293102 | 118295012  | 0.69 | 0.0379382 | 654     | Ebna1bp2      |
| chr1  | 99663760  | 99668742  | -0.57 | 0.0438172 | 418    | Ppip5k2       | chr13 | 51939965  | 51945611   | 0.35 | 0.0380319 | 745     | Gadd45g       |
| chr17 | 47873699  | 47876145  | -0.56 | 0.04392   | 43     | Tfeb          | chr11 | 5385229   | 5388153    | 0.47 | 0.0381539 | -33952  | Xbp1          |
| chr16 | 93353518  | 93354621  | -1.22 | 0.0440957 | 247    | 1810053B23Rik | chr2  | 61239690  | 61241299   | 0.83 | 0.0381539 | -176148 | Tank          |
| chr5  | 115017173 | 115018964 | -0.71 | 0.0443123 | -191   | Fam222a       | chr7  | 87750175  | 87751005   | 1.20 | 0.0381539 | -30312  | Gm15880       |
| chr16 | 10540085  | 10543422  | -0.53 | 0.0445189 | 1394   | Dexi          | chr9  | 61673212  | 61674160   | 1.00 | 0.0381564 | 88631   | Rplp1         |
| chr5  | 122160245 | 122166573 | -0.47 | 0.0445189 | 1792   | Atxn2         | chr1  | 9621855   | 9622475    | 1.52 | 0.0384423 | -992    | 2610203C22Rik |
| chr6  | 57481472  | 57482427  | -1.08 | 0.0445756 | 3471   | Ppm1k         | chr7  | 134151884 | 134153144  | 0.84 | 0.0385742 | 5594    | Mvp           |
| chr9  | 77503132  | 77504046  | -1.47 | 0.0446621 | 19051  | Klhl31        | chr13 | 47353810  | 47354982   | 0.80 | 0.0386604 | 65025   | Rnf144b       |
| chr17 | 31289639  | 31290505  | -1.06 | 0.0446621 | -8845  | Tff2          | chr19 | 9039603   | 9043423    | 0.40 | 0.0391062 | -17     | Eef1g         |
| chr14 | 48179891  | 48180349  | -2.10 | 0.0447877 | 7989   | Atg14         | chr17 | 27053856  | 27055465   | 0.75 | 0.039193  | 625     | Kifc5b        |
| chr15 | 8998519   | 9005747   | -0.43 | 0.0450005 | 1125   | Nadkd1        | chr4  | 44128646  | 44129939   | 0.87 | 0.039193  | -5472   | Gm12504       |
| chr17 | 30270973  | 30272022  | -1.26 | 0.0458078 | 129466 | Zfand3        | chr17 | 56252075  | 56257024   | 0.47 | 0.0394593 | 2172    | Plin5         |
| chr18 | 12792192  | 12795554  | -0.65 | 0.0458078 | -8168  | Ttc39c        | chr10 | 59239833  | 59241106   | 1.00 | 0.0397007 | 75087   | Micu1         |
| chr13 | 48719991  | 48721076  | -1.15 | 0.0467345 | 409    | Ptpdc1        | chr6  | 101326093 | 101327477  | 0.92 | 0.0407011 | 1106    | Pdzn3         |
| chr10 | 93622759  | 93624644  | -0.69 | 0.0469266 | 13026  | Nr2c1         | chr5  | 30918747  | 30921797   | 0.63 | 0.0407581 | -29280  | Gm9899        |
| chr10 | 40218970  | 40220597  | -1.01 | 0.0469399 | -70384 | Slc22a16      | chr11 | 11860168  | 11861611   | 1.12 | 0.0407663 | -62742  | Ddc           |
| chr4  | 60595839  | 60596981  | -1.00 | 0.0469399 | -1383  | Mup10         | chr5  | 147643840 | 147646311  | 0.43 | 0.0414217 | 610     | Rpl21         |
| chr10 | 98666243  | 98667989  | -0.80 | 0.0469399 | -58748 | Dusp6         | chr2  | 32815978  | 32820042   | 0.45 | 0.0415339 | 779     | Rpl12         |
| chr11 | 77703940  | 77707750  | -0.51 | 0.0469399 | 1529   | Pipox         | chr12 | 41225581  | 41226754</ |      |           |         |               |













Supplementary Table 1

|       |           |           |       |           |         |            |       |           |           |      |           |         |               |
|-------|-----------|-----------|-------|-----------|---------|------------|-------|-----------|-----------|------|-----------|---------|---------------|
| chr16 | 24198673  | 24200086  | -0.73 | 0.1902694 | -194056 | Lpp        | chr4  | 141172751 | 141175547 | 0.41 | 0.181391  | 399     | Tmem82        |
| chr4  | 131465658 | 131467331 | -0.68 | 0.1902694 | -11191  | Tmem200b   | chr1  | 57462488  | 57464708  | 0.35 | 0.1814687 | -80     | Tyw5          |
| chr3  | 97418283  | 97420694  | -0.67 | 0.1902694 | -5375   | Chd1l      | chr3  | 121152480 | 121153355 | 0.75 | 0.1814687 | 23459   | Cnn3          |
| chr8  | 108327723 | 108328778 | -0.95 | 0.1904282 | 23000   | Ranbp10    | chr4  | 46897935  | 46899728  | 0.52 | 0.1818865 | 105755  | Gabbr2        |
| chr2  | 90416528  | 90417334  | -0.91 | 0.1904282 | 3873    | Ptprj      | chrX  | 110298306 | 110299288 | 0.53 | 0.182329  | 327     | Chm           |
| chr18 | 56714413  | 56717298  | -0.52 | 0.1904282 | 6097    | Aldh7a1    | chr4  | 149521005 | 149522074 | 0.83 | 0.1825803 | -1541   | Slc2a7        |
| chr2  | 177690534 | 177692332 | -0.51 | 0.1904282 | 561     | Gm14326    | chr11 | 117823481 | 117832183 | 0.26 | 0.1826361 | 2848    | Socs3         |
| chr8  | 127470248 | 127474729 | -0.39 | 0.1904282 | 666     | Egln1      | chr2  | 72017861  | 72025368  | 0.29 | 0.1826361 | -102079 | B230120H23Rik |
| chr10 | 126414802 | 126421744 | -0.35 | 0.1906044 | 2501    | Ctdsp2     | chr13 | 67454418  | 67456335  | 0.54 | 0.1826361 | 6132    | Zfp953        |
| chr9  | 78195072  | 78196134  | -1.32 | 0.1915882 | -651    | Gsta2      | chr6  | 81999202  | 82004068  | 0.40 | 0.1830593 | 10014   | Eva1a         |
| chr11 | 59600133  | 59601452  | -0.90 | 0.1915882 | 367     | Pld6       | chr1  | 135975860 | 135977273 | 0.55 | 0.183094  | -834    | Btg2          |
| chr1  | 108068143 | 108071197 | -0.45 | 0.1921151 | 1225    | Phlpp1     | chr6  | 87836814  | 87839435  | 0.34 | 0.1831543 | 159     | Copg1         |
| chr7  | 30016516  | 30018314  | -0.56 | 0.1924978 | 126     | Kcnk6      | chr4  | 86257114  | 86258820  | 0.47 | 0.1831543 | -41     | Haus6         |
| chr6  | 83050930  | 83053992  | -0.46 | 0.1927127 | 952     | Ccdc142    | chr4  | 117563620 | 117564735 | 0.51 | 0.1831543 | 431     | Dph2          |
| chr2  | 3629700   | 3632389   | -0.46 | 0.1927127 | 315     | Fam107b    | chr3  | 27044720  | 27045583  | 0.69 | 0.1831543 | 7625    | Ect2          |
| chr9  | 42751624  | 42752992  | -0.70 | 0.1928197 | 146     | Grik4      | chr8  | 109972540 | 109973311 | 0.81 | 0.1831543 | 12628   | Wwp2          |
| chr17 | 32524776  | 32526673  | -0.57 | 0.1928197 | 171     | Wiz        | chr9  | 20549913  | 20550832  | 0.89 | 0.1831543 | -17714  | Olfm2         |
| chr13 | 35831924  | 35834944  | -0.54 | 0.1928337 | 164     | Cdyl       | chr19 | 7368654   | 7370417   | 0.44 | 0.1835662 | 392     | Mark2         |
| chrX  | 10294426  | 10296677  | -0.44 | 0.1935956 | 1061    | Mid1ip1    | chr9  | 48410592  | 48414550  | 0.31 | 0.1837961 | 611     | Nnmt          |
| chr8  | 122433865 | 122443074 | -0.35 | 0.193811  | 3718    | Usp10      | chr17 | 71535482  | 71536716  | 0.61 | 0.1842936 | 2782    | Lpin2         |
| chr12 | 55829679  | 55831461  | -0.51 | 0.1941309 | -33718  | Eapp       | chr7  | 105497711 | 105499449 | 0.58 | 0.1853825 | 11218   | Tsku          |
| chr2  | 118725707 | 118729577 | -0.46 | 0.194258  | 292     | Bahd1      | chr6  | 51562264  | 51563161  | 0.84 | 0.1853825 | 68191   | Snx10         |
| chr13 | 21901144  | 21902153  | -0.71 | 0.1944831 | 420     | Hist1h2bq  | chr7  | 87798337  | 87799078  | 0.81 | 0.1853931 | 17805   | Gm15880       |
| chr9  | 121798404 | 121800724 | -0.52 | 0.1949428 | -8017   | Ccbp2      | chr11 | 88770531  | 88771390  | 0.87 | 0.1859682 | 3719    | 4930405P13Rik |
| chr5  | 20386420  | 20388088  | -0.67 | 0.1962654 | 688     | Phtf2      | chr11 | 53701533  | 53702660  | 0.68 | 0.1864001 | 3109    | Slc22a5       |
| chr11 | 3021432   | 3025121   | -0.54 | 0.1967959 | -747    | Pisd-ps1   | chr5  | 9038595   | 9041616   | 0.38 | 0.1867574 | -42959  | Crot          |
| chr5  | 112715478 | 112728745 | -0.35 | 0.1969366 | 16385   | Tpst2      | chr11 | 69193120  | 69193907  | 0.87 | 0.1869326 | -10585  | Chd3          |
| chr2  | 78708172  | 78711259  | -0.49 | 0.1969502 | 512     | Ube2e3     | chr15 | 95682931  | 95683972  | 0.71 | 0.1872381 | 62178   | Ano6          |
| chr11 | 51780808  | 51782085  | -0.51 | 0.1973487 | 314     | Cdkn2aipnl | chr18 | 80457105  | 80459625  | 0.48 | 0.1874196 | 5321    | Pqlc1         |
| chr1  | 21246237  | 21246776  | -1.21 | 0.198061  | 15837   | Gsta3      | chr5  | 136258391 | 136259133 | 0.97 | 0.1874541 | 4244    | Mdh2          |
| chr4  | 3604547   | 3606879   | -0.45 | 0.198061  | 446     | Lyn        | chr8  | 87212826  | 87214599  | 0.43 | 0.1875229 | 567     | Trmt1         |
| chr6  | 121194689 | 121198446 | -0.45 | 0.198061  | 644     | Usp18      | chr8  | 77632495  | 77634162  | 0.46 | 0.1875229 | -98     | Mcm5          |
| chr5  | 114549832 | 114551427 | -0.49 | 0.1980803 | 288     | Usp30      | chr16 | 3908082   | 3909851   | 0.48 | 0.1877364 | -42     | Cluap1        |
| chr7  | 31277891  | 31280871  | -0.38 | 0.1986247 | 705     | Prodh2     | chr16 | 17130235  | 17133322  | 0.35 | 0.1887957 | 698     | Sdf2l1        |
| chr12 | 30622579  | 30624247  | -0.67 | 0.1989076 | 513     | Pxdn       | chr6  | 57652227  | 57654162  | 0.39 | 0.1887957 | 746     | Lanc12        |
| chr11 | 61675443  | 61677293  | -0.65 | 0.1989076 | -7774   | ULK2       | chr7  | 116258698 | 116259540 | 0.50 | 0.1887957 | -32281  | Ric3          |
|       |           |           |       |           |         |            | chr12 | 36212049  | 36213382  | 0.67 | 0.1887957 | 6946    | Ahr           |
|       |           |           |       |           |         |            | chr12 | 29595586  | 29596057  | 0.93 | 0.1896359 | 159129  | Tssc1         |
|       |           |           |       |           |         |            | chr10 | 12716421  | 12717164  | 1.07 | 0.1896359 | -11463  | Sf3b5         |
|       |           |           |       |           |         |            | chr16 | 22162045  | 22163322  | 0.62 | 0.1896842 | 689     | Igf2bp2       |
|       |           |           |       |           |         |            | chr12 | 86112535  | 86115247  | 0.34 | 0.1900568 | 171     | Npc2          |
|       |           |           |       |           |         |            | chr9  | 20808827  | 20809688  | 0.88 | 0.1900568 | 2077    | Mrpl4         |
|       |           |           |       |           |         |            | chr15 | 78904644  | 78907000  | 0.36 | 0.190119  | 170     | Eif3l         |
|       |           |           |       |           |         |            | chr15 | 75954046  | 75955329  | 0.52 | 0.1902194 | 2299    | BC024139      |
|       |           |           |       |           |         |            | chr19 | 4492447   | 4493046   | 0.93 | 0.1902694 | 5837    | 2010003K11Rik |
|       |           |           |       |           |         |            | chr7  | 147220622 | 147223320 | 0.37 | 0.1903169 | 278     | Tubgcp2       |
|       |           |           |       |           |         |            | chr8  | 87642499  | 87644102  | 0.46 | 0.1904282 | 3694    | Zfp791        |
|       |           |           |       |           |         |            | chr17 | 7031557   | 7033168   | 0.57 | 0.1904282 | -45233  | Ezr           |
|       |           |           |       |           |         |            | chr7  | 31771584  | 31772085  | 0.96 | 0.1912285 | 4895    | Fam187b       |
|       |           |           |       |           |         |            | chr9  | 23187922  | 23188359  | 1.12 | 0.1912989 | 160621  | Bmper         |
|       |           |           |       |           |         |            | chr4  | 139090085 | 139092994 | 0.45 | 0.1915882 | 5077    | Iffo2         |
|       |           |           |       |           |         |            | chr7  | 3226923   | 3230424   | 0.34 | 0.1920825 | 7900    | Mir295        |
|       |           |           |       |           |         |            | chr1  | 135033572 | 135034378 | 0.80 | 0.1920825 | 6233    | Ppp1r15b      |
|       |           |           |       |           |         |            | chr13 | 34364398  | 34364756  | 1.19 | 0.1927127 | 72474   | Slc22a23      |
|       |           |           |       |           |         |            | chr7  | 134004137 | 134006601 | 0.36 | 0.1928197 | -116    | Hirip3        |
|       |           |           |       |           |         |            | chr11 | 120399999 | 120403540 | 0.42 | 0.1928197 | 9272    | Fam195b       |
|       |           |           |       |           |         |            | chrX  | 131119524 | 131120094 | 1.05 | 0.1928197 | -383    | Rpl36a        |
|       |           |           |       |           |         |            | chr3  | 137890522 | 137891717 | 0.64 | 0.1932404 | 10383   | Adh7          |
|       |           |           |       |           |         |            | chr5  | 138627057 | 138629446 | 0.32 | 0.1939943 | 163     | Taf6          |
|       |           |           |       |           |         |            | chr11 | 11865634  | 11866850  | 0.72 | 0.1939943 | 61732   | Grb10         |
|       |           |           |       |           |         |            | chr17 | 23812892  | 23814697  | 0.44 | 0.1940019 | 622     | Tnfrsf12a     |
|       |           |           |       |           |         |            | chr12 | 34112121  | 34112689  | 1.24 | 0.1940019 | -2083   | Twistnb       |
|       |           |           |       |           |         |            | chr13 | 58225371  | 58225854  | 1.00 | 0.1941309 | 4305    | Hnrmpa0       |
|       |           |           |       |           |         |            | chr7  | 56651653  | 56656337  | 0.35 | 0.1943575 | 152437  | Nav2          |
|       |           |           |       |           |         |            | chr14 | 102038702 | 102040246 | 0.48 | 0.194611  | 214     | CommD6        |
|       |           |           |       |           |         |            | chr18 | 69683025  | 69683807  | 0.82 | 0.194836  | 178042  | Tcf4          |
|       |           |           |       |           |         |            | chr6  | 85797701  | 85802008  | 0.39 | 0.1955537 | -17970  | Nat8          |
|       |           |           |       |           |         |            | chr18 | 74427178  | 74429541  | 0.29 | 0.1962654 | 418     | Mbd1          |
|       |           |           |       |           |         |            | chr7  | 13862928  | 13865173  | 0.37 | 0.1967959 | 20      | 6330408A02Rik |
|       |           |           |       |           |         |            | chr8  | 64355494  | 64356408  | 0.91 | 0.1975292 | 25536   | Palld         |
|       |           |           |       |           |         |            | chr2  | 68973295  | 68975823  | 0.39 | 0.1979501 | 703     | Nostrin       |
|       |           |           |       |           |         |            | chr4  | 117353678 | 117355440 | 0.39 | 0.1979501 | 271     | Dmap1         |
|       |           |           |       |           |         |            | chr2  | 3428794   | 3431125   | 0.39 | 0.198061  | 127     | Hspa14        |
|       |           |           |       |           |         |            | chrX  | 131120096 | 131121909 | 0.43 | 0.198061  | 810     | Rpl36a        |
|       |           |           |       |           |         |            | chr15 | 38226809  | 38228849  | 0.45 | 0.198061  | 2633    | Klf10         |
|       |           |           |       |           |         |            | chr17 | 35369938  | 35373713  | 0.29 | 0.1980803 | 935     | Nfkbil1       |
|       |           |           |       |           |         |            | chr16 | 95923249  | 95927991  | 0.27 | 0.1983717 | 1607    | Ets2          |
|       |           |           |       |           |         |            | chr3  | 90340940  | 90342649  | 0.45 | 0.1986247 | -3350   | S100a16       |
|       |           |           |       |           |         |            | chr8  | 36469275  | 36470465  | 0.87 | 0.1987859 | 31076   | Ppp1r3b       |
|       |           |           |       |           |         |            | chr9  | 100981969 | 100983687 | 0.55 | 0.1999137 | 4378    | Msl2          |



































Supplementary Table 2

|       |           |           |       |           |       |         |       |           |           |      |           |        |               |
|-------|-----------|-----------|-------|-----------|-------|---------|-------|-----------|-----------|------|-----------|--------|---------------|
| chr6  | 113738562 | 113741245 | -0.13 | 0.1963841 | 778   | Sec13   | chr19 | 26603525  | 26609367  | 0.19 | 0.1720342 | 1287   | Smarca2       |
| chr12 | 55078817  | 55082230  | -0.12 | 0.1963841 | 28    | Srp54a  | chr11 | 6470954   | 6477384   | 0.20 | 0.1728735 | 1907   | Purb          |
| chr7  | 127243294 | 127246843 | -0.11 | 0.1963841 | 543   | Zfp771  | chr11 | 60725400  | 60732161  | 0.18 | 0.1739343 | 118    | Mir5100       |
| chr5  | 138116050 | 138118866 | -0.10 | 0.1963841 | 554   | Zscan21 | chr13 | 100550549 | 100553908 | 0.21 | 0.1742181 | 270    | Ocln          |
| chr7  | 99855695  | 99859667  | -0.15 | 0.1970297 | 1202  | Spcs2   | chr11 | 97798613  | 97804084  | 0.18 | 0.1746412 | 1677   | Laspl         |
| chr10 | 77109104  | 77119651  | -0.11 | 0.19717   | -672  | Col18a1 | chr17 | 24935294  | 24937528  | 0.20 | 0.1746412 | 566    | Mapk8ip3      |
| chr15 | 36789734  | 36795362  | -0.10 | 0.19717   | -1616 | Ywhaz   | chr13 | 64247455  | 64249777  | 0.23 | 0.1746412 | -78    | Cdc14b        |
| chr7  | 92560495  | 92562592  | -0.14 | 0.1976178 | 395   | Ccdc90b | chr12 | 102282060 | 102286195 | 0.20 | 0.1748493 | 487    | Rin3          |
| chr7  | 111080179 | 111084174 | -0.10 | 0.1976178 | 854   | Eif4g2  | chr6  | 90713848  | 90717219  | 0.19 | 0.1756869 | 996    | lqsec1        |
| chr10 | 63386246  | 63387365  | -0.19 | 0.1984368 | 243   | Dnajc12 | chr5  | 121543855 | 121546883 | 0.20 | 0.176452  | 523    | Mapkapk5      |
| chr7  | 25717327  | 25720403  | -0.10 | 0.1984368 | 188   | Ccdc97  | chr16 | 93711937  | 93713436  | 0.26 | 0.1768181 | 780    | Dopey2        |
| chr16 | 18407398  | 18417517  | -0.09 | 0.1987154 | 1037  | Comt    | chr8  | 4252184   | 4254785   | 0.20 | 0.1769022 | 383    | Snapc2        |
| chr2  | 91629725  | 91638010  | -0.19 | 0.1990036 | 2547  | F2      | chr10 | 95555168  | 95564172  | 0.15 | 0.1771015 | -349   | Mir3058       |
| chr6  | 83123545  | 83125762  | -0.15 | 0.1990036 | 376   | Ino80b  | chr17 | 73107224  | 73109153  | 0.22 | 0.1771015 | 204    | Lclat1        |
| chr7  | 73532651  | 73542091  | -0.09 | 0.1990562 | 4375  | Chd2    | chr11 | 50025381  | 50027639  | 0.23 | 0.1773083 | 1180   | Rnf130        |
| chr11 | 58328465  | 58332715  | -0.09 | 0.1993054 | -127  | Sh3bp5l | chr17 | 34647089  | 34648783  | 0.22 | 0.1775838 | 791    | Atf6b         |
| chr5  | 38037936  | 38040720  | -0.10 | 0.1994107 | 94    | Stx18   | chr2  | 26019511  | 26022439  | 0.23 | 0.1779293 | 785    | Ubac1         |
| chr5  | 77310110  | 77312184  | -0.16 | 0.1994369 | 664   | Polr2b  | chr12 | 32378544  | 32380553  | 0.27 | 0.1779293 | 760    | Ccdc71l       |
| chr10 | 81182850  | 81185322  | -0.13 | 0.1994375 | 169   | Dapk3   | chr15 | 98726415  | 98728515  | 0.23 | 0.1784209 | 733    | Fkbp11        |
| chr7  | 140940319 | 140944833 | -0.14 | 0.1997343 | 996   | Athl1   | chr17 | 33288957  | 33290709  | 0.26 | 0.1784209 | 290    | Zfp955b       |
| chr2  | 181286437 | 181289376 | -0.13 | 0.1997343 | 60    | Gmeb2   | chr2  | 30263691  | 30270392  | 0.16 | 0.1785203 | 223    | Phyhd1        |
| chr3  | 90291292  | 90293053  | -0.21 | 0.1997424 | 25639 | Dennd4b | chr1  | 43932890  | 43936451  | 0.19 | 0.1788138 | 664    | Tpp2          |
| chr19 | 24960447  | 24961806  | -0.17 | 0.1997616 | 490   | Cbwd1   | chr5  | 30814143  | 30817814  | 0.23 | 0.1793634 | 1223   | Mapre3        |
| chr1  | 151426333 | 151430565 | -0.10 | 0.1999186 | -14   | Swt1    | chr14 | 60784521  | 60785611  | 0.27 | 0.1793825 | 501    | Mipep         |
|       |           |           |       |           |       |         | chr9  | 65460411  | 65462190  | 0.23 | 0.1795432 | 364    | Spg21         |
|       |           |           |       |           |       |         | chr15 | 100493964 | 100495955 | 0.24 | 0.180099  | 280    | Csrnp2        |
|       |           |           |       |           |       |         | chr13 | 98924691  | 98927469  | 0.21 | 0.1803552 | 304    | Tnpo1         |
|       |           |           |       |           |       |         | chr11 | 107129460 | 107131827 | 0.27 | 0.1804278 | 1279   | Bptf          |
|       |           |           |       |           |       |         | chr17 | 33253926  | 33255488  | 0.27 | 0.1813728 | 438    | Zfp955a       |
|       |           |           |       |           |       |         | chr9  | 106169786 | 106174635 | 0.19 | 0.1815731 | 1282   | Wdr82         |
|       |           |           |       |           |       |         | chr9  | 108569434 | 108571291 | 0.26 | 0.1820859 | 471    | Dalrd3        |
|       |           |           |       |           |       |         | chr3  | 100489343 | 100490459 | 0.28 | 0.1821387 | -709   | Fam46c        |
|       |           |           |       |           |       |         | chr13 | 84221494  | 84223768  | 0.23 | 0.1821463 | 336    | Tmem161b      |
|       |           |           |       |           |       |         | chr5  | 65333753  | 65336510  | 0.25 | 0.1822294 | 508    | Rfc1          |
|       |           |           |       |           |       |         | chr7  | 105734924 | 105740257 | 0.15 | 0.1823342 | -205   | Rrp8          |
|       |           |           |       |           |       |         | chr15 | 98829486  | 98832992  | 0.20 | 0.1828881 | 269    | Prkag1        |
|       |           |           |       |           |       |         | chr19 | 6241452   | 6243988   | 0.23 | 0.1833415 | 1053   | Atg2a         |
|       |           |           |       |           |       |         | chr7  | 101298556 | 101303406 | 0.25 | 0.1833415 | 1107   | Atg16l2       |
|       |           |           |       |           |       |         | chr8  | 95080940  | 95082291  | 0.26 | 0.1833415 | 415    | Katnb1        |
|       |           |           |       |           |       |         | chr13 | 74521281  | 74523899  | 0.21 | 0.1845483 | -28640 | Zfp825        |
|       |           |           |       |           |       |         | chr3  | 137917667 | 137920088 | 0.24 | 0.1849813 | 323    | Lamtor3       |
|       |           |           |       |           |       |         | chr11 | 60218805  | 60224087  | 0.21 | 0.1850334 | -842   | Srebf1        |
|       |           |           |       |           |       |         | chr5  | 125336485 | 125342138 | 0.18 | 0.1851647 | 1783   | Scarb1        |
|       |           |           |       |           |       |         | chr14 | 55589113  | 55594760  | 0.16 | 0.1852453 | 147    | Rnf31         |
|       |           |           |       |           |       |         | chr17 | 74716670  | 74718551  | 0.23 | 0.1853287 | -139   | Ttc27         |
|       |           |           |       |           |       |         | chr10 | 128703439 | 128705953 | 0.20 | 0.1854228 | 355    | Cdk2          |
|       |           |           |       |           |       |         | chr2  | 75832136  | 75833706  | 0.25 | 0.1857681 | 745    | Agps          |
|       |           |           |       |           |       |         | chr17 | 12317426  | 12319464  | 0.22 | 0.1867629 | 215    | Map3k4        |
|       |           |           |       |           |       |         | chr4  | 125065637 | 125068659 | 0.19 | 0.186815  | 456    | Snip1         |
|       |           |           |       |           |       |         | chr8  | 111990631 | 111992777 | 0.27 | 0.1870538 | 598    | Adat1         |
|       |           |           |       |           |       |         | chr13 | 111801667 | 111810440 | 0.20 | 0.1873407 | 2930   | Map3k1        |
|       |           |           |       |           |       |         | chr1  | 165192175 | 165194608 | 0.23 | 0.1875607 | 1042   | Sft2d2        |
|       |           |           |       |           |       |         | chr17 | 33907875  | 33911613  | 0.17 | 0.1892262 | 144    | Daxx          |
|       |           |           |       |           |       |         | chr3  | 79287212  | 79288886  | 0.25 | 0.1893195 | -57326 | Gm17359       |
|       |           |           |       |           |       |         | chr5  | 111416203 | 111418624 | 0.24 | 0.1896521 | -752   | Mn1           |
|       |           |           |       |           |       |         | chr12 | 98733358  | 98735998  | 0.20 | 0.1902279 | -33    | Ptpn21        |
|       |           |           |       |           |       |         | chr18 | 62977152  | 62979662  | 0.20 | 0.1902279 | 492    | Napg          |
|       |           |           |       |           |       |         | chr4  | 121014171 | 121017548 | 0.23 | 0.1906217 | 1388   | Smap2         |
|       |           |           |       |           |       |         | chr17 | 32319016  | 32323848  | 0.15 | 0.190885  | -279   | Akap8         |
|       |           |           |       |           |       |         | chr15 | 85652221  | 85655369  | 0.21 | 0.1910821 | -52807 | Mirlet7c-2    |
|       |           |           |       |           |       |         | chr5  | 3801222   | 3804553   | 0.20 | 0.1913214 | 222    | Ankib1        |
|       |           |           |       |           |       |         | chr9  | 67039551  | 67044040  | 0.19 | 0.1918875 | 2076   | Tpm1          |
|       |           |           |       |           |       |         | chr5  | 33334748  | 33338171  | 0.24 | 0.1922542 | 888    | Maea          |
|       |           |           |       |           |       |         | chr14 | 55680397  | 55681889  | 0.26 | 0.1924061 | 674    | Tinf2         |
|       |           |           |       |           |       |         | chr6  | 136807534 | 136810025 | 0.23 | 0.1924435 | 532    | H2afj         |
|       |           |           |       |           |       |         | chr17 | 35438517  | 35441387  | 0.22 | 0.1929623 | 786    | H2-Q9         |
|       |           |           |       |           |       |         | chr13 | 55320272  | 55323983  | 0.17 | 0.1930293 | 73     | Prelid1       |
|       |           |           |       |           |       |         | chr11 | 88998051  | 89006272  | 0.13 | 0.1930983 | 2759   | Trim25        |
|       |           |           |       |           |       |         | chr5  | 24029203  | 24030969  | 0.26 | 0.1931212 | 597    | Fam126a       |
|       |           |           |       |           |       |         | chr6  | 56714189  | 56717483  | 0.21 | 0.193388  | 932    | Avl9          |
|       |           |           |       |           |       |         | chr14 | 65356375  | 65361815  | 0.20 | 0.1934723 | 420    | Zfp395        |
|       |           |           |       |           |       |         | chr4  | 59579921  | 59584328  | 0.20 | 0.1934723 | 562    | Hsd12         |
|       |           |           |       |           |       |         | chr9  | 21987761  | 21990924  | 0.19 | 0.1940179 | 111    | Rgl3          |
|       |           |           |       |           |       |         | chr3  | 103787417 | 103792312 | 0.18 | 0.1945324 | 1411   | Hipk1         |
|       |           |           |       |           |       |         | chr9  | 22130143  | 22133151  | 0.23 | 0.1945524 | 218    | Acp5          |
|       |           |           |       |           |       |         | chr15 | 11993811  | 11996586  | 0.26 | 0.1945524 | 809    | Sub1          |
|       |           |           |       |           |       |         | chr14 | 69730485  | 69734799  | 0.16 | 0.1945614 | -72    | Chmp7         |
|       |           |           |       |           |       |         | chr11 | 4112171   | 4119601   | 0.16 | 0.1946938 | 2843   | Sec14l2       |
|       |           |           |       |           |       |         | chr9  | 4308425   | 4311253   | 0.21 | 0.1947644 | 24     | Kbtbd3        |
|       |           |           |       |           |       |         | chr5  | 113772742 | 113774585 | 0.22 | 0.1951644 | 852    | Iscu          |
|       |           |           |       |           |       |         | chr6  | 35252149  | 35256846  | 0.26 | 0.1955582 | 1766   | 1810058l24Rik |
|       |           |           |       |           |       |         | chr5  | 110093685 | 110095734 | 0.22 | 0.1958158 | -5259  | Plcxd1        |
|       |           |           |       |           |       |         | chr9  | 65014244  | 65023338  | 0.21 | 0.1960172 | 2926   | Ptplad1       |
|       |           |           |       |           |       |         | chr13 | 21178650  | 21182758  | 0.19 | 0.1963841 | 774    | Trim27        |
|       |           |           |       |           |       |         | chr4  | 124851032 | 124852813 | 0.24 | 0.1963841 | 1164   | Yrdc          |
|       |           |           |       |           |       |         | chr10 | 95513890  | 95514909  | 0.29 | 0.1966067 | -762   | Ube2n         |
|       |           |           |       |           |       |         | chr14 | 101639285 | 101641182 | 0.23 | 0.1967094 | 238    | Commdd6       |
|       |           |           |       |           |       |         | chr15 | 85645337  | 85647591  | 0.22 | 0.1970297 | -60138 | Mirlet7c-2    |
|       |           |           |       |           |       |         | chr11 | 101448061 | 101450533 | 0.25 | 0.19717   | 886    | Ifi35         |
|       |           |           |       |           |       |         | chr1  | 80338054  | 80340243  | 0.22 | 0.1982033 | 1282   | Cul3          |
|       |           |           |       |           |       |         | chr17 | 42873947  | 42876652  | 0.21 | 0.1985337 | 1125   | Cd2ap         |

Supplementary Table 2

|  |  |  |  |  |  |  |       |           |           |      |           |      |               |
|--|--|--|--|--|--|--|-------|-----------|-----------|------|-----------|------|---------------|
|  |  |  |  |  |  |  | chr19 | 57357346  | 57360842  | 0.19 | 0.1988741 | 1805 | B230217O12Rik |
|  |  |  |  |  |  |  | chr19 | 6082831   | 6086158   | 0.21 | 0.1989348 | 397  | Zfpl1         |
|  |  |  |  |  |  |  | chr11 | 22855608  | 22861137  | 0.16 | 0.1993416 | 1363 | B3gnt2        |
|  |  |  |  |  |  |  | chr1  | 194619277 | 194621639 | 0.22 | 0.1997424 | 630  | Plxna2        |

Supplementary Table 3

|                                     |                                                                                                                                                                                                                                                                                                                                                                                                                                                                                                                                                                                                                                                                                                                                             |                                                                                                                                                                                                                                                                                                                                                                                                                                                                                                                                                                                                                                                                                                                                                                                                                                                                                                                                                                                                                                                                                                                                                                                                                                                                                                                                                                                                                                                                                                                                                                                                                                                                                                                                                                                                                                                                                                                                                                                                                                                                                                                                                                |                          |
|-------------------------------------|---------------------------------------------------------------------------------------------------------------------------------------------------------------------------------------------------------------------------------------------------------------------------------------------------------------------------------------------------------------------------------------------------------------------------------------------------------------------------------------------------------------------------------------------------------------------------------------------------------------------------------------------------------------------------------------------------------------------------------------------|----------------------------------------------------------------------------------------------------------------------------------------------------------------------------------------------------------------------------------------------------------------------------------------------------------------------------------------------------------------------------------------------------------------------------------------------------------------------------------------------------------------------------------------------------------------------------------------------------------------------------------------------------------------------------------------------------------------------------------------------------------------------------------------------------------------------------------------------------------------------------------------------------------------------------------------------------------------------------------------------------------------------------------------------------------------------------------------------------------------------------------------------------------------------------------------------------------------------------------------------------------------------------------------------------------------------------------------------------------------------------------------------------------------------------------------------------------------------------------------------------------------------------------------------------------------------------------------------------------------------------------------------------------------------------------------------------------------------------------------------------------------------------------------------------------------------------------------------------------------------------------------------------------------------------------------------------------------------------------------------------------------------------------------------------------------------------------------------------------------------------------------------------------------|--------------------------|
| Hyper-acetylated by SAHA<br>FDR<0.1 | <b>DAVID Cell Proliferation Term Categories</b><br>Pathways in cancer<br>BP00207:Cell cycle control<br>Colorectal cancer<br>Non-small cell lung cancer<br>BP00281:Oncogenesis<br>BP00203:Cell cycle<br>BP00224:Cell proliferation and differentiation<br>Acute myeloid leukemia<br>Renal cell carcinoma<br>Thyroid cancer<br>Pancreatic cancer<br>cell proliferation<br>Endometrial cancer<br>regulation of growth<br>Prostate cancer<br>cell cycle<br>developmental growth<br>cell division<br>regulation of epithelial cell proliferation<br>regulation of cell proliferation<br>BP00206:Chromosome segregation<br>regulation of cell cycle<br>cell cycle arrest<br>BP00264:Tumor suppressor<br>negative regulation of cell proliferation | <b>Cell Proliferation Term Linked Genes*</b><br>2900026A02Rik<br>Ctcfb<br>Dhcr7<br>Foxp4<br>Kat2b<br>Nat6<br>Ppp1r7<br>Sbds<br>Tgm2<br>Zfp369<br>Acvr1b<br>Ccnc6<br>Dlc1<br>Frs2<br>Kazald1<br>Ncor2<br>Ppp3ca<br>Sertad3<br>Tmem57<br>Zmiz1<br>Acvr2a<br>Ccnd3<br>Dli1<br>Fzd4<br>Kdm1a<br>Ndfip1<br>Prkaca<br>Sesn2<br>Tns1<br>Adora1<br>Ccne1<br>Dph1<br>Fzd7<br>Lgr4<br>Ndr3<br>Prkd3<br>Sesn3<br>Top1mt<br>Agpat6<br>Ccncf<br>Dsccl1<br>Fzd8<br>Lifr<br>Nedd9<br>Prpf19<br>Shb<br>Top2b<br>Agnr<br>Cd9<br>Dusp7<br>Gadd45b<br>Ligl2<br>Neurl4<br>Psap<br>Sik2<br>Tpm3<br>Akap13<br>Cdc37<br>Dvl1<br>Gamt<br>Lmfn<br>Nfkb2<br>Ptch1<br>Sipa1<br>Traf3<br>Akt1<br>Cdc42<br>E2f3<br>Gipc1<br>Lrp4<br>Nin1<br>Pwp2<br>Ski<br>Traf4<br>Apbb2<br>Cdk18<br>E2f4<br>Gm13277<br>Lzts2<br>Notch1<br>Racgap1<br>Slc2a1<br>Traf6<br>Appl1<br>Cfl1<br>Egln3<br>Gnai2<br>Macf1<br>Notch2<br>Rai1<br>Slfn9<br>Trim27<br>Arhgef18<br>Cited2<br>Eif4ebp1<br>Gpam<br>Mafk<br>Npat<br>Ralb<br>Smad3<br>Trip10<br>Arl8a<br>Col18a1<br>Eif4ebp2<br>Hdac11<br>Mapk6<br>Oaz2<br>Rap1b<br>Smad5<br>Trp53bp2<br>Armc10<br>Creb3l1<br>Elavl1<br>Hectd3<br>Mapk9<br>Otd5<br>Ragef1<br>Smad7<br>Tsyp1<br>Atxn2<br>Creg1<br>Epha2<br>Hira<br>Mbd2<br>Pak4<br>Rara<br>Smc4<br>Ttl<br>B4galnt7<br>Csda<br>Erbb4<br>Hras1<br>Mef2d<br>Papd5<br>Rassf1<br>Socs7<br>Tuba1c<br>Bapn<br>Cse1l<br>Etv5<br>Ing1<br>Mif<br>Papd7<br>Rassf5<br>Sos1<br>Tuba4a<br>Bax<br>Csk<br>Fadd<br>Ing2<br>Mll1<br>Pard6b<br>Rb1<br>Sp7<br>Tuba8<br>Bbc3<br>Csnk1d<br>Fam179b<br>Irf1<br>Mllt6<br>Parp1<br>Rbms1<br>St5<br>Tubb5<br>Bcar1<br>Csnk1g2<br>Fert2<br>Irf6<br>Mphosph6<br>Pdpr1<br>Rbpj<br>Stard13<br>Ube2g2<br>Bcl2l11<br>Ctbp1<br>Fgfr3<br>Irs1<br>Mxd4<br>Pgap2<br>Rcc2<br>Stat5b<br>Upf1<br>Bin3<br>Cttnb1<br>Flot2<br>Jag1<br>Mycbp2<br>Plcg1<br>Rhot2<br>Stk11<br>Vav2<br>Brd1<br>Ctss<br>Fos<br>Jak1<br>Myh10<br>Plk2<br>Rif1<br>Stk30<br>Vhl<br>Btg1<br>Cyrf61<br>Foxj2<br>Jak2<br>Myh9<br>Pml<br>Rock2<br>Stradb<br>Wdr5<br>Casp3<br>Dpp<br>Foxo2<br>Jarid2<br>Nacc1<br>Ppp1cc<br>Rpa1<br>Stx2<br>Ywhaq<br>Casp9<br>Ddah1<br>Foxo3<br>Jup<br>Nasp<br>Ppp1r13l<br>Rxxa<br>Tcf7l1<br>Zfp318 |                          |
|                                     | <b>DAVID Cell Death Term Categories</b><br>programmed cell death<br>regulation of apoptosis<br>apoptosis<br>regulation of programmed cell death<br>regulation of cell death<br>cell death<br>death<br>positive regulation of apoptosis<br>BP00179:Apoptosis<br>positive regulation of programmed cell death<br>positive regulation of cell death<br>apoptotic mitochondrial changes<br>induction of programmed cell death<br>induction of apoptosis<br>negative regulation of apoptosis<br>negative regulation of programmed cell death<br>negative regulation of cell death<br>release of cytochrome c from mitochondria                                                                                                                   | <b>Cell Death Term Linked Genes*</b><br>Adora1<br>Dnase2<br>Mef2d<br>Shb<br>Akap13<br>Dpm1<br>Mtch2<br>Shf<br>Akt1<br>Ece2<br>Naif1<br>Sirt1<br>Apbb2<br>Egln1<br>Nfkb2<br>Snail<br>Api5<br>Egln3<br>Notch1<br>Sqstm1<br>Arhgef18<br>Erbb4<br>Notch2<br>Stat5b<br>Bax<br>Fadd<br>Nr3c1<br>Stk17b<br>Bbc3<br>Fgfr3<br>Nr4a1<br>Stradb<br>Bcl2l11<br>Foxo3<br>Nuak2<br>Tex261<br>Bik<br>Gadd45b<br>Oaz2<br>Tgm2<br>Bmf<br>Gatad2a<br>Pacs2<br>Timm50<br>Btg1<br>Gcll<br>Pcgf2<br>Tmbim6<br>calpain 10<br>Gm13277<br>Pdccl6<br>Tns1<br>Casp3<br>Hdac11<br>Pgap2<br>Traf3<br>Casp9<br>Hras1<br>Plekhl1<br>Traf4<br>Cbx4<br>Irfh1<br>Pml<br>Traf6<br>Cebpg<br>Ing1<br>Ppp1cc<br>Triap1<br>Chd8<br>Ing2<br>Ppp1r13l<br>Trib3<br>Cib1<br>Irfak3<br>Prkd3<br>Trmt61a<br>Cited2<br>Itsn1<br>Rassf1<br>Trp53bp2<br>Col18a1<br>Jak1<br>Rassf3<br>Tsyp1<br>Csda<br>Jak2<br>Rassf5<br>Wwox<br>Csrn1p<br>Kdm1a<br>Rhot2<br>Ypel3<br>Cttnb1<br>Klf11<br>Sgms1<br>Zc3h12a<br>Dedcl2<br>Mapk9<br>Sh3glb1                                                                                                                                                                                                                                                                                                                                                                                                                                                                                                                                                                                                                                                                                                                                                                                                                                                                                                                                                                                                                                                                                                                                                                        | *by official gene symbol |
| Deacetylated by SAHA<br>FDR<0.1     | <b>DAVID Cell Proliferation Term Categories</b><br>regulation of cell cycle<br>regulation of growth                                                                                                                                                                                                                                                                                                                                                                                                                                                                                                                                                                                                                                         | <b>Cell Proliferation Term Linked Genes*</b><br>Ahsg<br>Nfkbil1<br>Azgp1<br>Ppan<br>B230120H23Rik<br>Prox1<br>Bre<br>Pten<br>Cdk4<br>Rai1<br>Cdk5rap1<br>Rbp4<br>Chd7<br>Rps6<br>Creb1<br>Shcl<br>Dmap1<br>Sik1<br>E4f1<br>Sin3b<br>El24<br>Socs3<br>Gadd45g<br>Spr<br>Ghr<br>Tipin<br>Hexim1<br>Hopx<br>Hspa8<br>Igfbb4<br>Jun<br>Junb<br>Mbl1<br>Mdm2<br>Myc<br>Ncor1<br>Ndufs3<br>Nek6                                                                                                                                                                                                                                                                                                                                                                                                                                                                                                                                                                                                                                                                                                                                                                                                                                                                                                                                                                                                                                                                                                                                                                                                                                                                                                                                                                                                                                                                                                                                                                                                                                                                                                                                                                      |                          |
|                                     | <b>DAVID Cell Death Term Categories</b><br>apoptosis<br>death<br>programmed cell death<br>cell death                                                                                                                                                                                                                                                                                                                                                                                                                                                                                                                                                                                                                                        | <b>Cell Death Term Linked Genes*</b><br>1810011010Rik<br>Opa1<br>Phlda1<br>Aimp1<br>Plg<br>Ank2<br>Pten<br>Asah2<br>Rps6<br>Birc2<br>Smndcl<br>Bre<br>Spr<br>C8a<br>Sra1<br>Cflar<br>Tbrg4<br>Clptm1l<br>Ticam1<br>Cyca<br>Vcp<br>Dap<br>Dnaja3<br>Ebag9<br>Gadd45g<br>Gata6<br>Gpx1<br>Hc<br>Jak2<br>Krt8<br>Luc7l3<br>Map3k5<br>Myc<br>Nek6<br>Nfkbil1                                                                                                                                                                                                                                                                                                                                                                                                                                                                                                                                                                                                                                                                                                                                                                                                                                                                                                                                                                                                                                                                                                                                                                                                                                                                                                                                                                                                                                                                                                                                                                                                                                                                                                                                                                                                       | *by official gene symbol |

Supplementary Table 4

| Deacetylated in Regenerating Liver (q<0.1) and Hyper-acetylated by SAHA (q<0.1) |          |         |
|---------------------------------------------------------------------------------|----------|---------|
| Abhd6                                                                           | Gramd3   | Tmem57  |
| Adck3                                                                           | Gse1     | Traf4   |
| Akap13                                                                          | Gtl3     | Ube2h   |
| Atxn2                                                                           | H2-K1    | Usp2    |
| B4galt5                                                                         | Herc3    | Whamm   |
| Bcar1                                                                           | Ipmk     | Zfp385b |
| Bik                                                                             | Klhl21   | Zscan2  |
| Bmf                                                                             | Larp1    |         |
| Cat                                                                             | Larp1b   |         |
| Cdc42bpb                                                                        | Lpcat3   |         |
| Col27a1                                                                         | Map1lc3a |         |
| Csk                                                                             | Mettl7a1 |         |
| Dbp                                                                             | Mlxipl   |         |
| Ddah1                                                                           | Ndfip1   |         |
| Dexi                                                                            | Notch2   |         |
| Dgat2                                                                           | Nr1d1    |         |
| Dio1                                                                            | Nr3c1    |         |
| Dirc2                                                                           | Phlpp2   |         |
| Dpm1                                                                            | Samd8    |         |
| Dtnbp1                                                                          | Sesn2    |         |
| Fam63b                                                                          | Spen     |         |
| Foxo3                                                                           | Srebf1   |         |
| Gclc                                                                            | Tef      |         |
| Glt25d1                                                                         | Tle3     |         |
| Gpr125                                                                          | Tmbim6   |         |

Supplementary Table 4

| Hyper-acetylated in Regenerating Liver (q<0.1) and Deacetylated by SAHA (q<0.1) |            |          |         |
|---------------------------------------------------------------------------------|------------|----------|---------|
| AA986860                                                                        | Igf1       | Ptges2   | Ttpal   |
| Acin1                                                                           | Il1r1      | Qsox1    | Usf2    |
| Atoh8                                                                           | Inhbe      | Rbpms    | Xbp1    |
| Barx2                                                                           | Insig2     | Rpl21    | Zfp36l1 |
| C3                                                                              | Irgq       | Rpl4     | Zyg11a  |
| Cbr4                                                                            | Itih2      | Rplp1    |         |
| Chid1                                                                           | Lcn2       | Rps26    |         |
| Cldn14                                                                          | Mettl20    | Scp2     |         |
| Cml2                                                                            | Mfsd2a     | Sik1     |         |
| Crem                                                                            | Mgst1      | Slc17a1  |         |
| Ctnnd1                                                                          | Mir122a    | Slc39a14 |         |
| Dap                                                                             | Mir1894    | Slc41a2  |         |
| Ddx28                                                                           | Mir21      | Slc45a1  |         |
| Echdc2                                                                          | Mir295     | Slco1a4  |         |
| Fam83a                                                                          | Mirlet7c-2 | Snx10    |         |
| Fgg                                                                             | Mllt4      | St3gal1  |         |
| Fmo1                                                                            | Mrap       | Stk24    |         |
| Gadd45g                                                                         | Myc        | Stt3a    |         |
| Galnt2                                                                          | Nfx1       | Tbl1xr1  |         |
| Gm16157                                                                         | Nlrp12     | Tcf7l2   |         |
| Grn                                                                             | Nnmt       | Thpo     |         |
| Gtf2h4                                                                          | Nos1ap     | Tm6sf2   |         |
| Hpx                                                                             | Pck1       | Trappc6b |         |
| Id3                                                                             | Pisd       | Treh     |         |
| Idi1                                                                            | Prox1      | Trib1    |         |

Supplementary Table 4

| Deacetylated in Regenerating Liver (q<0.2) and Hyper-acetylated by SAHA (q<0.2) |          |          |           |          |
|---------------------------------------------------------------------------------|----------|----------|-----------|----------|
| Abhd6                                                                           | Dio1     | H2-T23   | Phtf2     | Tnpo1    |
| Adck3                                                                           | Dirc2    | Herc3    | Plk2      | Tns3     |
| Agpat6                                                                          | Dlc1     | Hpcal1   | Ppp3ca    | Tpst2    |
| Arhgap29                                                                        | Dpm1     | Il12rb1  | Qdpr      | Traf4    |
| Atxn2                                                                           | Dtnbp1   | Ipml     | Rassf3    | Trp53bp2 |
| B4galt5                                                                         | Egln1    | Irs1     | Rgs12     | Ube2h    |
| Bahd1                                                                           | Eif4ebp2 | Itgb5    | Rnf19b    | Usp10    |
| Bcar1                                                                           | Ern1     | Jmy      | Samd8     | Usp18    |
| Bik                                                                             | Fam108c  | Klhl21   | Sc5d      | Usp2     |
| Bmf                                                                             | Fam49b   | Larp1    | Sema4b    | Whamm    |
| Cat                                                                             | Fam63b   | Larp1b   | Serpina1a | Zbtb2    |
| Ccdc171                                                                         | Fbxl20   | Lpcat3   | Sesn2     | Zfp385b  |
| Ccnd3                                                                           | Fbxo32   | Lyn      | Slc25a33  | Zfp740   |
| Cdc42                                                                           | Fcho2    | Map1lc3a | Smim18    | Zfyve1   |
| Cdc42bpb                                                                        | Fdx1     | Mettl7a1 | Spen      | Zmym5    |
| Cdyl                                                                            | Foxj2    | Mir30d   | Srebf1    | Zscan2   |
| Col27a1                                                                         | Foxo1    | Mlxipl   | Ssbp3     |          |
| Cpne3                                                                           | Foxo3    | Mxi1     | Stat5b    |          |
| Csk                                                                             | Gcl      | N4bp2    | Stim2     |          |
| Ctdsp2                                                                          | Glt25d1  | Ncor2    | Tcp11l2   |          |
| Cyth1                                                                           | Gpr125   | Ndfip1   | Tef       |          |
| Dbp                                                                             | Gramd3   | Nr1d1    | Tle2      |          |
| Ddah1                                                                           | Gse1     | Nr3c1    | Tle3      |          |
| Dexi                                                                            | Gtl3     | Nr4a1    | Tmbim6    |          |
| Dgat2                                                                           | H2-K1    | Phlpp2   | Tmem57    |          |

Supplementary Table 4

| Hyper-acetylated in Regenerating Liver (q<0.2) and Deacetylated by SAHA (q<0.2) |         |         |          |           |          |         |
|---------------------------------------------------------------------------------|---------|---------|----------|-----------|----------|---------|
| Acin1                                                                           | Cyp2c70 | Id3     | Mllt4    | Prox1     | Slc6a13  | Usf2    |
| Acsn1                                                                           | Cyp3a11 | Idi1    | Mrap     | Ptges2    | Slco1a4  | Wdr45b  |
| Adipor2                                                                         | Dap     | Igf1    | Msl2     | Qsox1     | Snord104 | Xbp1    |
| Adk                                                                             | Ddx28   | Il1r1   | Mst1     | Rbpms     | Snx10    | Xrn1    |
| Ahr                                                                             | Dpyd    | Inhbe   | Myc      | Ric3      | Socs3    | Zbtb45  |
| Alpl                                                                            | Dscr3   | Insig2  | Nat8     | Rpl11     | Spns2    | Zfp36l1 |
| Ambp                                                                            | Echdc2  | Irgq    | Ndufa8   | Rpl21     | St3gal1  | Zyg11a  |
| Anapc15                                                                         | Eef1a1  | Isoc2b  | Nfkbil1  | Rpl4      | Stk24    |         |
| Atoh8                                                                           | Eef1g   | Itih2   | Nfx1     | Rpl8      | Stt3a    |         |
| Atp5k                                                                           | Efna5   | Krt18   | Nlrp12   | Rplp1     | Suclg2   |         |
| Atxn7l3b                                                                        | Egfr    | Krt8    | Nnmt     | Rps26     | Susd1    |         |
| Barx2                                                                           | F2      | Lcat    | Nos1ap   | Rps4x     | Taf6     |         |
| C3                                                                              | Fam83a  | Lcn2    | Nr2f2    | Rpsa      | Tatdn2   |         |
| Cald1                                                                           | Fgg     | Lrig2   | Nr5a2    | Rreb1     | Tbl1xr1  |         |
| Cbr4                                                                            | Fmo1    | Lrrc59  | Orm1     | Sdr42e1   | Tcf7l2   |         |
| Ccdc25                                                                          | Gadd45g | Mbd1    | Pan2     | Sec61g    | Thpo     |         |
| Chid1                                                                           | Gale    | Mbl1    | Pck1     | Serpina3n | Tlr1     |         |
| Cldn14                                                                          | Galnt2  | Mettl20 | Pdia5    | Shroom3   | Tm6sf2   |         |
| Cmah                                                                            | Gpt2    | Mfsd2a  | Pemt     | Sik1      | Trappc6b |         |
| Cml2                                                                            | Gtf2h4  | Mgst1   | Phf15    | Slc17a1   | Treh     |         |
| Copg1                                                                           | Haus6   | Mir122a | Piga     | Slc22a1   | Trf      |         |
| Creb3l3                                                                         | Hc      | Mir148a | Pik3r1   | Slc25a22  | Trib1    |         |
| Crem                                                                            | Hmgn3   | Mir1894 | Pisd     | Slc39a14  | Ttc4     |         |
| Ctnnd1                                                                          | Hnrnpa0 | Mir21   | Ppp1r15b | Slc41a2   | Ttpal    |         |
| Cyp2a12                                                                         | Hpx     | Mir295  | Pprc1    | Slc45a1   | Tyw5     |         |
